1  
2  
3  
4  
5  
6  
7  
8  
9  
10  
11  
12  
13  
14  
15  
16  
17  
18  
19  
20  
21  
22  
23  
24  
25  
26  
27  
28  
29  
30  
31  
32  
33  
34  
35  
36  
37  
38  
39  
40  
41  
42  
43  
44

## Pancreas-specific miR-216a regulates proliferation and endocrine and exocrine cell function *in vivo*

Suheda Erener<sup>1,2</sup>, Cara E. Ellis<sup>1</sup>, Adam Ramzy<sup>1</sup>, Maria M. Glavas<sup>1</sup>, Shannon O'Dwyer<sup>1</sup>, Sandra Pereira<sup>1</sup>, Tom Wang<sup>1</sup>, Janice Pang<sup>1</sup>, Jennifer E. Bruin<sup>1,3</sup>, Michael J. Riedel<sup>1</sup>, Robert K. Baker<sup>1</sup>, Travis D. Webber<sup>1</sup>, Janel L. Kopp<sup>1</sup>, Stephan Herzig<sup>2</sup>, Timothy J. Kieffer<sup>1,4</sup>

<sup>1</sup>Department of Cellular & Physiological Sciences, Life Sciences Institute, University of British Columbia, Vancouver, BC, Canada

<sup>2</sup>Institute for Diabetes and Cancer, Helmholtz Center Munich, Neuherberg, Germany; Joint Heidelberg-IDC Translational Diabetes Program, Inner Medicine 1, Heidelberg University Hospital, Heidelberg, Germany; Technical University Munich, 85764 Neuherberg, Germany; Deutsches Zentrum für Diabetesforschung, 85764 Neuherberg, Germany

<sup>3</sup>Department of Biology and Institute of Biochemistry, Carleton University, Ottawa, Ontario, Canada

<sup>4</sup>Department of Surgery, University of British Columbia, Vancouver, BC, Canada

**Short title:** miR-216a regulates endocrine and exocrine cell function

**Key words:** miR-216a,  $\beta$ -cell mass, diabetes, PDAC

**Abstract word count:** 246

**Total word count:** 7446 (including methods)

**Disclosure Statement:** The authors have nothing to disclose.

45 **Abstract**

46 Pancreas is a vital organ composed of exocrine and endocrine cells that aid digestion of food  
47 and regulate blood glucose levels. Perturbations in the function of pancreatic cells leads to the  
48 development of life-burdening and/or threatening diseases such as diabetes and pancreatic  
49 cancer. Thus, it is critical to understand the molecular check-points that maintain normal  
50 pancreas physiology. MicroRNAs (miRNAs) are small non-coding RNAs involved in  
51 regulating gene expression in normal and diseased tissues. Several miRNAs have tissue-  
52 specific patterns consistent with crucial functions in many biological processes. Yet, there is  
53 limited knowledge about the role of pancreas-specific miRNAs in pancreatic pathologies.  
54 Here, we report that miR-216a is a conserved, pancreas-specific miRNA that is expressed in  
55 both endocrine and exocrine cells. Deletion of miR-216a in mice leads to reduced  $\beta$ -cell mass  
56 and a reduction in islet size under both chow and high-fat diet feeding conditions. We show  
57 that inhibition of miR-216a increases apoptosis and decreases cell proliferation in  $\beta$ - and  
58 exocrine cells. *Smad7* is upregulated in miR-216a deficient islets and cell cycle and  
59 proliferation are among the most significantly regulated biological processes in miR-216  
60 knockout pancreata. Re-introduction of miR-216a in the pancreatic cancer line, PANC-1,  
61 increases cell migration more than 2-fold. *In vivo*, deletion of miR-216a in the pancreatic  
62 cancer prone mouse line *Kras*<sup>G12D</sup>;*Ptfla*<sup>CreER</sup> inhibits the propensity of pancreatic cancer  
63 precursor lesions. Our study identifies miR-216a as an important pancreas-specific miRNA  
64 which may have implications for both diabetes and pancreatic cancer.

65

## 66 **Introduction**

67 The pancreas, an abdominal organ located behind the stomach, is composed of two major  
68 functional compartments. The exocrine pancreas, mainly comprised of acinar cells, aids  
69 digestion by secreting digestive enzymes amylase and lipase via pancreatic ducts into the  
70 duodenum while the endocrine pancreas, consisting of the islets of Langerhans, maintains  
71 normal glucose homeostasis. Islets are interspersed within the exocrine pancreas and consist  
72 of five different endocrine cells required for energy metabolism. The  $\beta$ -cells comprise 50-  
73 80% of the islets<sup>1</sup> and are responsible for secreting insulin in response to changes in glucose  
74 levels. Perturbations in the function of endocrine and exocrine cells leads to the development  
75 of life-burdening and/or threatening diseases such as diabetes and pancreatic cancer. While  
76 diabetes is characterized by hyperglycemia resulting from defects in insulin secretion, insulin  
77 action, or both<sup>2</sup>, pancreatic ductal adenocarcinoma, a major form of pancreatic cancer in  
78 humans, results from the abnormal proliferation of the exocrine cells in response to oncogenic  
79 mutations<sup>3</sup>. To date many protein coding genes necessary for pancreas development and  
80 function have been identified, but the role of the majority of small RNAs is still unclear.

81  
82 Micro-RNAs (miRNAs) are short (~21-22 nt long) non-coding RNAs, which have emerged in  
83 the last two decades as buffers of signalling pathways to maintain normal tissue development  
84 and function<sup>4</sup>. Mature miRNAs function as evolutionarily conserved post-transcriptional gene  
85 regulators that mainly decrease the stability or inhibit translation of messenger RNAs  
86 (mRNAs) through binding to complementary sequences<sup>5</sup>. A single miRNA can impact the  
87 regulation of hundreds of genes with multiple targets<sup>6</sup> within cellular networks that enable  
88 modulation of entire pathways in the context of an individual biological process<sup>7</sup>. Many  
89 miRNAs are conserved in sequence between distantly related organisms, suggesting that these  
90 molecules participate in essential processes. Recently, a study identified 3,707 novel mature  
91 miRNAs by analyzing 1,323 short RNA sequencing samples from 13 different human tissue

92 types<sup>8</sup>, providing evidence that the repertoire of human miRNAs is far more extensive than  
93 that of public repositories and of what was previously anticipated<sup>9</sup>. Interestingly, many of the  
94 newly discovered miRNAs possess tissue specific patterns, akin to proteins. The functional  
95 impact of these miRNAs on various diseases remains to be investigated.

96

97 In the pancreas, conditional deletion of the miRNA processing endonuclease *Dicer* at the  
98 onset of pancreatic development (e9.5) using a *Pdx1-Cre* strain results in defects in all  
99 pancreatic lineages with dramatic reduction in the ventral pancreas as well as a reduction in  
100 the overall epithelial contribution to the dorsal pancreas at e18.5<sup>10</sup>. Postnatal *Dicer* ablation in  
101 the  $\beta$ -cells using the conditional *RIP2-Cre*<sup>11,12</sup> or *Pdx1-CreER*<sup>13</sup> strain impairs islet  
102 architecture, insulin secretion, and  $\beta$ -cell mass while deletion of *Dicer* in the acinar cells using  
103 the *Mist1-CreERT* mice<sup>14</sup> promotes epithelial to mesenchymal transition accompanied by  
104 acinar to ductal metaplasia. Although previous findings demonstrate important roles for *Dicer*  
105 in the pancreas, *in vivo* studies investigating the role of individual miRNAs in pancreas  
106 development and endocrine and exocrine function are limited. Furthermore, the majority of  
107 investigated miRNAs do not have pancreas-specific expression.

108

109 Tissue-specific patterns of gene expression play fundamental roles in tissue development and  
110 function<sup>15</sup>. Although the majority of miRNAs are ubiquitously expressed, some miRNAs  
111 exhibit tissue-specific<sup>8</sup> or developmental-stage-specific expression patterns and contribute to  
112 maintaining normal tissue identity and function<sup>16</sup>. Furthermore, tissue-specific miRNAs are  
113 associated with various human diseases such as cardiovascular disease<sup>17</sup> and cancer<sup>18</sup>.

114 Therefore, it is critical to unravel the tissue specific regulatory networks to better understand  
115 the molecular mechanisms underlying diseases and identify new disease genes. In this study,  
116 we hypothesized that pancreas-enriched miRNAs have specific, critical roles for pancreas  
117 development and/or function and hence sought to identify miRNAs enriched in the pancreatic



118 cells. Our results show that miR-216a is a pancreas-specific miRNA with critical functional

119 roles in both endocrine and exocrine cells.

120

121 **Results**

122 To identify the miRNAs that are enriched in pancreatic islets, we performed miRNA profiling  
123 from adult human islets and compared it to embryonic stem (ES) cells. We identified nine  
124 miRNAs that showed greater than 3-fold expression in human islets compared to ES cells  
125 (**Figure 1a**). Out of the nine miRNAs identified, only miR-216a showed a pancreas- specific  
126 expression pattern (**Figure 1b**) while the eight other miRNAs were ubiquitously expressed in  
127 the analyzed tissues (**Suppl. Figure 1a**). To examine whether miR-216a levels are changed  
128 during endocrine cell development, we differentiated human ES cells to pancreatic like cells.,  
129 When comparing sequential timepoints, the single largest increase in levels of miR-216a  
130 occurred on day 14 (**Figure 1c**) of the differentiation protocol, which marks the generation of  
131 PDX1<sup>+</sup>/NKX6.1<sup>+</sup> pancreatic endocrine progenitor cells<sup>19</sup>. miR-216a levels further increased  
132 during differentiation, reaching the highest levels at the final stage of differentiation (days 26-  
133 33), correlating with the presence of pancreatic endocrine cells. To further investigate miR-  
134 216a expression during development, we performed *in situ* hybridization with human fetal  
135 pancreatic tissue using DIG labelled miR-216a-LNA probes. There was a faint staining in the  
136 pancreatic tissue at the gestational time 8 weeks 4 days (8W 4d) (**Figure 1d**), during the time  
137 when insulin and glucagon double positive cells emerge<sup>20</sup>. However, we detected strong miR-  
138 216a staining in the branching pancreatic epithelium that harbor PDX1+ / NKX6.1+  
139 pancreatic endocrine progenitor cells<sup>20</sup>. Analysis of human adult pancreas also revealed strong  
140 pancreatic miR-216a staining with further enrichment in pancreatic islets (**Figure 1d**). To  
141 further investigate the specificity of miR-216a for pancreatic tissue, we performed *in situ*  
142 hybridization on kidney capsule grafts obtained from mice and rats implanted with pancreatic  
143 progenitor cells that had developed to endocrine cells<sup>21</sup>. There was strong reactivity for miR-  
144 216a in the grafts whereas neighboring kidney sections had no detectable staining (**Suppl.**  
145 **Figure 1b**). We next examined the miR-216a sequence across diverse species and found it to  
146 be highly conserved (**Figure 1e**), suggestive of a functional importance. A thorough tissue

147 expression analysis from C57BL/6 mice showed miR-216a levels were specifically expressed  
148 in the pancreas with further enrichment in pancreatic islets (**Figure 1f**), akin to our results  
149 with human tissues, suggesting a role for miR-216a miRNA in islet development and/or  
150 function.

151  
152 To explore the role of miR-216a in pancreatic islet function *in vivo*, we generated miR-216a  
153 knock-out mice (miR-216a KO) in which the precursor sequence of miR-216a (pre-miR-216)  
154 was deleted by homologous recombination<sup>22</sup>. qRT-PCR analysis for miR-216a using total  
155 RNA from isolated islets of miR-216a KO mice revealed that miR-216a was not detected  
156 (**Suppl. Fig 2a**). KO mice were viable and there were no significant differences in fasting  
157 body weight, blood glucose and insulin levels from newly weaned 3-4 weeks old miR-216a  
158 KO and littermate wild-type (WT) mice (**Suppl. Fig 2b-d**). Pancreas weight and pancreatic  
159 cell size were unchanged (**Suppl. Fig 2e-f**). We next monitored the miR-216a KO mice  
160 weekly for over 20 weeks for changes in body weight and blood glucose levels. miR-216a KO  
161 mice were comparable to WT littermate controls (**Figure 2a, b**). Oral glucose tolerance tests  
162 performed at 10 and 15 weeks of age revealed no significant genotype differences in blood  
163 glucose (**Figure 2c, Suppl. Figure 2e**) or insulin levels (**Figure 2d**). Similarly, miR-216a KO  
164 mice had normal insulin tolerance at 12 weeks of age and response to arginine injection at 18  
165 weeks (**Figure 2e, Suppl. Figure 2f**). We next assessed whether islets from miR-216a KO  
166 mice had altered insulin secretion *ex vivo*. Glucose (16.7 mM) stimulated insulin secretion  
167 from miR-216a KO islets was comparable to WT islets albeit insulin release was significantly  
168 lower at 2.8 mM glucose (**Figure 2f**). Correspondingly, islets isolated from the miR-216a KO  
169 mice appeared generally smaller than the WT islets (**Figure 2g, h**), and lacked the bigger  
170 islets with a trend towards an increased number of smaller islets (**Figure 2i**). To analyze the  
171 effect of miR-216a KO on islet structure in more detail, we performed immunostaining with  
172 fixed pancreas tissue harvested from 21-week old adult mice. Immunostaining with insulin

173 and glucagon antibodies demonstrated that  $\beta$ -cell mass was significantly reduced in the miR-  
174 216a KO mice while  $\alpha$ -cell mass was unchanged (**Figure 3a-c**). Islet circularity and the  
175 location of  $\alpha$ -cells were unchanged (**Suppl. Fig 3a**). Consistent with the isolated islet data,  
176 the area of islets determined by synaptophysin immunostaining was significantly smaller in  
177 miR-216a KO mice (**Figure 3a, d**) and miR-216a KO pancreatic sections harbored less of the  
178 larger islets (**Figure 3e**). To examine whether the effects of miR-216a on  $\beta$ -cell mass and islet  
179 size was postnatally regulated, we performed the same analysis in newborn mice. Average  
180 islet size in one-day old miR-216a KO pups was comparable to WT littermates (**Figure 3f, g**),  
181 with no statistical difference in various islet size groups (**Figure 3f, h**). Interestingly, there  
182 was a trend towards an increased frequency for larger islets in the miR-216a KO pups (**Figure**  
183 **3h**).  $\beta$ -cell and  $\alpha$ -cell area were not different as well as islet circularity and peripheral  $\alpha$ -cells  
184 in one day old pups (**Suppl. Figure 3b-c**).

185 To explore the reasons for smaller islet size and reduced  $\beta$ -cell mass in miR-216a KO mice,  
186 we first examined the key hormones and transcription factors regulating endocrine cell  
187 identity. Expression of *Insulin*, *Glucagon*, *Pdx1*, and *Nkx6.1* were not changed in islets from  
188 miR-216a KO mice (**Suppl. Fig 4a**). We next investigated whether miR-216a alters cell  
189 migration and proliferation. Regulation of islet size is complex and involves cellular  
190 processes such as fusion, fission, growth and migration<sup>23</sup>. Cell migration is critical for both  
191 islet formation and the movement of islets away from ducts<sup>24,25</sup>. We transfected pancreatic  
192 ductal adenocarcinoma PANC-1 cells that have very low miR-216a levels (not shown) and  
193 migration ability with control (ctrl) or miR-216 mimetics and performed a migration assay  
194 using transwell chambers. Quantification of the cells that traversed the boyden chambers  
195 demonstrated that miR-216a more than doubled the number of migrating cells compared to  
196 untransfected and control miRNA transfected wells (**Figure 4a**). We next assessed the  
197 migration ability of miR-216a KO islet cells *ex vivo*. We coated cell culture plates with the

198 matrix secreted by 804G cells and monitored the spreading of islets by light microscopy. Five  
199 days post-seeding, more WT islets spread compared to miR-216a KO islets while miR-216a  
200 KO islets had more defined borders (**Figure 4b**).

201 TGF- $\beta$  signalling regulates pancreatic epithelium branching and cell migration to form islet  
202 clusters<sup>26</sup>. It has been previously shown that miR-216a expression is regulated by TGF- $\beta$   
203 signalling and alters expression of *Pten*<sup>27,28</sup> and *Smad7*<sup>28</sup>. To investigate the potential  
204 signalling pathways regulating miR-216a expression in the pancreas, we treated EndoC- $\beta$ H1  
205 cells, which have high endogenous miR-216a levels, with a TGF- $\beta$  agonist TGF- $\beta$ 1 and the  
206 inhibitor SB431542 and measured miR-216a levels by qPCR. TGF- $\beta$ 1 treatment significantly  
207 increased miR-216 expression and inhibition of TGF signalling with SB431542 significantly  
208 decreased miR-216a levels (**Figure 4c-d**). We next examined mRNA levels of potential miR-  
209 216a target genes in the pancreatic islets of WT and miR-216a KO mice. qRT-PCR analysis  
210 from islets of WT and miR-216a KO mice indicated that *Smad7* expression was significantly  
211 upregulated in the miR-216a KO islets whereas *Pten* levels were not changed (**Figure 4e**).

212 TGF- $\beta$  signalling and *Smad7* are known regulators of cell migration and their mode of action  
213 is thought to be via altering the expression of genes involved in regulating extracellular matrix  
214 composition<sup>29</sup>. We analyzed the levels of ECM genes in miR-216a transfected cells using an  
215 extracellular matrix (ECM) gene array. miR-216a altered the expression of 12 genes out of  
216 the 87 genes analyzed (**Figure 4f**). Levels of genes involved in basement membrane such as  
217 *Col4a2*, *Ecm1*, *Fbln1*, *Lama3*, *Lamb2*, *Lamb3* were upregulated in the miR-216a transfected  
218 cells suggesting that TGF- $\beta$  induced miR-216a can increase cell migration by altering the  
219 extracellular matrix integrity of basement membrane. We next investigated whether inhibition  
220 of miR-216a can affect cell proliferation and cell death by transfecting INS-1E  $\beta$ -cells with  
221 miR-216a and a control scrambled miRNA inhibitor. INS-1E  $\beta$ -cells have higher levels of  
222 miR-216a as compared to other rodent  $\beta$ -cell lines such as MIN6 (not shown) thus were

223 chosen for miR-216a inhibition experiments. Inhibition of miR-216a significantly reduced  
224 cell proliferation compared to control miRNA inhibitors (**Figure 4g**). Analysis of cell death  
225 using live cell imaging indicated that inhibition of miR-216a in the presence of cytotoxic  
226 factors (TNF- $\alpha$ , IFN- $\gamma$ , IL-1 $\beta$ ) increased the rate of apoptosis (**Figure 4h**) providing a  
227 possible mechanism for the smaller islet size.

228 Many miRNAs display their functional role under metabolic stress or upon cell insult<sup>30</sup>. We  
229 first explored whether miR-216a levels were altered in the islets of leptin knock-out (LepKO)  
230 rats, a model for metabolic overload with disturbed glucose and energy metabolism and larger  
231 islets<sup>31</sup>. Indeed miR-216a levels were significantly higher in the LepKO rat islets whereas  
232 levels of another well-studied islet enriched miRNA, miR-375, were unchanged (**Figure 5a**).

233 Although glucose metabolism in miR-216a KO mice was comparable to WT mice under  
234 chow-diet conditions, we next assessed whether reduced islet size and  $\beta$ -cell mass in miR-  
235 216a KO mice could result in impaired glucose homeostasis under high-fat diet conditions.  
236 miR-216a KO mice and the littermate WT controls were placed on 60% high-fat diet for eight  
237 weeks. Fasting body weight and blood glucose levels were comparable throughout the study  
238 (**Figure 5b-c**). An oral glucose tolerance test performed 2 weeks after HFD feeding also  
239 revealed no significant differences in blood glucose levels (**Figure 5d**), but miR-216a KO  
240 mice secreted less insulin in response to glucose administration (**Figure 5e**). Similarly,  
241 repetition of the oral glucose tolerance test 6 weeks after HFD feeding showed no differences  
242 in blood glucose levels (**Figure 5f**). However, miR-216a KO mice showed a trend towards  
243 reduced insulin secretion with significance at the basal time-point prior to oral glucose  
244 delivery (**Figure 5g**). Insulin tolerance tests performed three and eight weeks after HFD  
245 feeding indicated similar insulin sensitivity of miR-216a KO and WT mice (**Figure 5h-i**).

246 Consistent with the reduced insulin secretion observed in the miR-216a KO mice, the animals  
247 had significantly reduced  $\beta$ -cell mass compared to controls (**Figure 5j,l**). In agreement with

248 reduced  $\beta$ -cell mass, miR-216a KO mice had decreased circulating miR-375 levels (**Figure**  
249 **5m**), a miRNA that is highly expressed in the  $\beta$ -cells<sup>32</sup> and is detected in the circulation<sup>33,34</sup>.  
250 We next measured plasma insulin and proinsulin levels to investigate whether the decreased  
251  $\beta$ -cell mass was reflected in circulating insulin levels and whether  $\beta$ -cell work load was  
252 comparable between WT and miR-216a KO mice. Plasma insulin levels were comparable  
253 between WT and KO mice however, proinsulin levels were significantly decreased in the  
254 miR-216a KO mice (**Figure 5 n-o**), suggesting increased insulin processing in the KO  $\beta$ -cells  
255 to meet the metabolic demands. The degree of cell proliferation was comparable in the WT  
256 and miR-216a KO  $\beta$ -cells as assessed by PCNA immunostaining (**Figure 5 j,p**). To examine  
257 islet size, pancreata were immunostained for synaptophysin (**Figure 5 k**). Like mice on chow  
258 diet, miR-216a KO mice fed HFD also had significantly smaller islets (**Figure 5q**), with  
259 increased frequency of smaller islets and decreased occurrence of larger islets (**Figure 5r**).  
260 Overall, these data indicate that under metabolically stressed condition of HFD, miR-216a  
261 KO mice secrete lower insulin during a glucose challenge and have decreased islet size with  
262 reduced  $\beta$ -cell mass and increased markers of  $\beta$ -cell stress.

263  
264 Although we determined that *Smad7* expression was increased in the islets of miR-216a KO  
265 mice, we sought to perform a global analysis to further explore signalling pathways targeted  
266 by miR-216a in the whole pancreas. We performed RNA-sequencing from the pancreata of  
267 one day old WT and miR-216a KO mice. The RNA integrity number (RIN) obtained from the  
268 pancreata of miR-216a KO mice were all above 8 and suitable for RNA-sequencing (not  
269 shown). We examined the top 50 most abundant genes expressed in WT and miR-216a KO  
270 pancreata and observed the expected abundance for *Amylase*, *Trypsin* and *Insulin*, yet they  
271 were not significantly different between WT and miR-216a KO mice (**Figure 6a**).

272 Differential gene expression analysis from all the transcripts using an adjusted p-value < 0.05  
273 revealed 409 genes were differentially expressed between WT and KO pancreata (**Suppl.**

274 **table 1).** To identify more globally the affected biological processes in the miR-216a KO  
275 pancreata, we next performed a Gene Ontology analysis and found cell cycle to be most  
276 significantly altered (**Figure 6b**). Similarly, KEGG pathway analysis indicated cell cycle,  
277 DNA replication and repair pathways were statistically different in the miR-216a KO versus  
278 WT pancreata (**Figure 6c**). Next, we compared the expression of genes involved in cell cycle  
279 pathways between WT and miR-216a KO pancreata and observed that many cyclin dependent  
280 kinases (e.g: *Cdk4*, *Cdk1*) and cyclins (e.g: *Ccne1*) as well as DNA replication genes (e.g:  
281 *Pcna*, *Mcm2*, *Mcm5*) were decreased in the pancreas of miR-216a KO mice (**Figure 6d**). This  
282 was consistent with our observation that inhibition of miR-216a decreases cell proliferation in  
283 INS-1E  $\beta$ -cells (**Figure 4g**) and the presence of reduced  $\beta$ -cell mass and islet size in the miR-  
284 216a KO mice. A map of the cell cycle pathway with genes significantly regulated in miR-  
285 216a KO pancreata is shown in (**Suppl. Fig 5**). To investigate the effect of miR-216a on cell  
286 proliferation in cells with exocrine origin, we transfected human PANC-1 cells with the miR-  
287 216a mimetic and another miRNA, miR-217. Similar to INS1-1E  $\beta$ -cells, miR-216a  
288 transfection significantly increased the number of cells (**Figure 6e**), and decreased the rate of  
289 apoptosis (**Figure 6f**), thus confirming the role of miR-216a in regulating cell proliferation in  
290 another pancreatic cell type.

291  
292 We next investigated whether the absence of miR-216a alters the progression of a pancreatic  
293 pathology related to cell cycle/proliferation in acinar cells. Oncogenic KRAS can induce  
294 pancreatic ductal adenocarcinoma (PDAC) precursor lesions from pancreatic acinar cells<sup>35,36</sup>.  
295 A number of studies have shown that PDAC develops from abnormally proliferating cells in  
296 the precursor lesions termed pancreatic intraepithelial neoplasia (PanIN)<sup>37</sup>, the most common  
297 precursor lesions observed in humans. A mutation in KRAS oncogene is currently considered  
298 as the initiating factor in pancreatic cancer<sup>38</sup>. Expression of constitutively active *Kras*<sup>G12D</sup>  
299 allele in mice induces PanINs and after a significant latency period PDAC<sup>39</sup>. We crossed



300 miR-216a KO mice with the pancreatic cancer prone *Kras*<sup>G12D</sup>;*Ptfla*<sup>CreER</sup> mice (**Figure 7a**)  
301 and analyzed the frequency of PanINs in the pancreata of offspring. As expected, H&E  
302 staining from the pancreata of *Kras*<sup>G12D</sup>;*Ptfla*<sup>CreER</sup>;*miR-216a*<sup>(+/+)</sup> mice revealed widespread  
303 lesions with columnar to cuboidal cells with varying degrees of cytological and architectural  
304 atypia (**Figure 7b**). In contrast, the pancreata of mice lacking miR-216a had limited  
305 neoplastic lesions. Further histological analysis with Alcian blue staining confirmed the  
306 histological characteristic of high acidic mucin content of PanINs in the WT mice, whereas  
307 miR-216a KO pancreata had decreased PanIN frequency (**Figure 7c**). In  
308 *Kras*<sup>G12D</sup>;*Ptfla*<sup>CreER</sup>;*miR-216a*<sup>(-/-)</sup> mice there was more than 2-fold reduction in the Alcian  
309 blue<sup>+</sup> area compared to *Kras*<sup>G12D</sup>;*Ptfla*<sup>CreER</sup>;*miR-216a*<sup>(+/+)</sup> mice. (**Figure 7d**). These data  
310 indicate that acinar cells from the miR-216a<sup>(-/-)</sup> mice have less propensity than miR-216a<sup>(+/+)</sup>  
311 mice to form PanINs and acinar to ductal metaplasia in response to oncogenic KRAS.  
312

## 313 **Discussion**

314 We predicted that pancreas-enriched miRNAs likely have specific, critical roles for pancreas  
315 development and/or function and hence sought to identify miRNAs enriched in pancreatic  
316 cells. Our results show that miR-216 is a highly conserved pancreas-specific miRNA with  
317 roles in both endocrine and exocrine cell function. In the endocrine pancreas, we found that  
318 miR-216a regulates  $\beta$ -cell mass and islet size by increasing cell proliferation and migration. In  
319 the exocrine pancreas, miR-216a regulated cell cycle and proliferation and deletion of miR-  
320 216a decreased the formation of PanINs, implicating miR-216a in the progression of  
321 pancreatic pathologies such as diabetes and cancer.

322 miR-375 was the first reported islet “specific” miRNA<sup>32</sup> with a role in maintaining normal  $\alpha$ -  
323 and  $\beta$ -cell mass<sup>45</sup>. To our knowledge our study is the first to identify a pancreas-specific  
324 miRNA with functional roles in both endocrine and exocrine pancreas. Although we also  
325 observed an enrichment for miR-375 in human and mouse islets, it is also expressed at high  
326 levels in other tissues and non-pancreatic roles for this miRNA have been identified, such as  
327 in the regulation of gut mucosal immunity<sup>46</sup> and gastric tumorigenesis<sup>47</sup>. Specificity of miR-  
328 216a for the pancreas suggests clinical opportunities to exploit this miRNA as a biomarker in  
329 pancreatic pathologies. Indeed, Goodwin et al. have shown that circulating miR-216 levels are  
330 increased in a mouse model of acute pancreatitis<sup>48</sup>. Szafranska et al. have shown that  
331 pancreatic tissue from PDAC patients have a large decrease in miR-216 expression<sup>49</sup> and  
332 others have shown that miR-216 levels are lower in fecal specimens of patients with chronic  
333 pancreatitis and pancreatic cancer<sup>50</sup>. Further studies are required to evaluate the utility of  
334 miR-216a as serum biomarker of pancreatic pathologies and whether it can distinguish  
335 between different forms of pancreatic cancer and/or pancreatitis.

336 Using human and mouse tissue panels, fetal and adult human pancreas and human endocrine  
337 cell transplant models, we demonstrated that miR-216a is specific to pancreatic tissue.  
338 Therefore, a global miR-216a KO mouse was used to investigate the role of miR-216a in both  
339 endocrine and exocrine compartments *in vivo*. Islets isolated from the miR-216a KO mice  
340 were smaller and secreted less insulin than control islets. Similarly, analysis of pancreatic  
341 tissue confirmed the presence of smaller islets and reduced  $\beta$ -cell mass in the miR-216a KO  
342 adult mice, whether on normal or high fat diet. Interestingly, pancreata from the miR-216a  
343 KO newborn mice had a trend towards increased islet size. Islet growth is size-dependent  
344 during development, with preferential expansion of smaller islets and fission of large  
345 interconnected islet-like structures occurring most actively at approximately three weeks of  
346 age at the time of weaning<sup>23</sup>. As we observed a major difference in islet size in the miR-216a  
347 KO mice postnatally, our data supports a postnatal role for miR-216a in islet cell expansion  
348 and migration. Indeed, we show miR-216a increases cell migration and proliferation *in vitro*.  
349 Further studies are required to examine whether miR-216a can also impact cell fission.  
350  
351 Levels of miR-216a were regulated by TGF- $\beta$  signalling and deletion of miR-216a led to an  
352 increase in *Smad7* levels in the miR-216a KO islets. This result is in alignment with published  
353 data showing that forced expression of miR-216a increases epithelial to mesenchymal  
354 transition (EMT) and migration with metastatic ability in epithelial hepatic cellular carcinoma  
355 (HCC) cells by targeting *Pten* and *Smad7*<sup>28</sup>. Although we did not observe any differences in  
356 *Pten* transcript or protein levels (not shown), we found an increase in *Smad7* levels in islets of  
357 miR-216a KO mice. We also observed changes in the expression of genes involved in EMT  
358 and migration in MIN6 and PANC-1 cells. Lack of *Pten* regulation by miR-216a in our study  
359 could be explained by differences in target gene selection under physiological vs.  
360 overexpression conditions such as the one used in the aforementioned studies. Alternatively,

361 the selection of studied cell types (pancreas vs. HCC cells) could lead to differences in  
362 miRNA targets.

363

364 Analysis of RNA-seq results showed that cell cycle pathways were the most significantly  
365 enriched GO term in the miR-216a KO mice. Similarly, DNA replication, nuclear division,  
366 and cell proliferation were among the most altered biological processes. As miRNAs affect  
367 the expression of multiple genes, identifying signalling pathways targeted by miRNAs rather  
368 than minor changes in individual genes are more meaningful to interpret the role of miRNAs  
369 in the cellular and physiological context. By opting to isolate pancreatic RNA from one-day  
370 old pups, we focused on the earliest biological changes that occurred in the miR-216a KO  
371 mice postnatally, thereby revealing the potential causal mechanisms for the observed  
372 phenotype. Based on the expression of miR-216a in the acinar tissue as well as on the altered  
373 pathways in miR-216a KO pancreata, we hypothesized miR-216a may have a functional role  
374 in pancreatic cancer initiation. Our data show that deletion of miR-216 in the presence of  
375 oncogenic signals reduces incidence of neoplastic lesions in pancreatic cancer.

376

377 Cancer is characterized by uncontrolled proliferation resulting from aberrant activity of cell  
378 cycle proteins, thus many cell cycle regulators are important targets in cancer therapy<sup>51</sup>. A  
379 hallmark genetic event in PDAC is loss of the CDKN2A/2B tumor suppressor locus<sup>52</sup> which  
380 encodes Cdk4/6 inhibitors that are particularly important for KRAS driven tumors such as  
381 PDAC<sup>53,54</sup>. Our RNA-seq analysis identified downregulation of many cell cycle and  
382 proliferation genes such as *Cdk1*, *Cdk4* and *Pcna* in the miR-216a KO mice and we found  
383 reduced PanIN formation in the presence of oncogenic KRAS, both of which suggest partial  
384 protection from pancreatic cancer initiation. TGF- $\beta$  signalling pathway is another important  
385 and commonly deregulated signalling pathway in pancreatic carcinomas<sup>55</sup>. Activation of  
386 TGF- $\beta$  leads to phosphorylation of Smad complexes to translocate to the nucleus and activate

387 their target genes involved in cell cycle progression<sup>55</sup>. We showed that miR-216a levels are  
388 regulated by TGF- $\beta$  signalling and miR-216a deletion increases levels of *Smad7*, which is a  
389 known inhibitor of cell cycle progression. Our results support a model whereby TGF- $\beta$   
390 induced miR-216 directly reduces *Smad7* levels and increases the expression of genes  
391 involved in cell cycle progression which in the presence of oncogenic mutations such as  
392 KRAS give rise to PanIN lesions. Whether there are other direct miR-216a targets mitigating  
393 this effect needs further evaluation. MiRNA based therapies are becoming more attractive due  
394 to their stability, sequence specificity and relative ease of miRNA synthesis<sup>56</sup>. Recently,  
395 engineered exosomes carrying short hairpin RNA specific to oncogenic Kras<sup>G12D</sup>, targeted  
396 oncogenic KRAS with an enhanced efficacy and suppressed cancer in multiple mouse models  
397 of pancreatic cancer<sup>57</sup>. It remains to be investigated whether inhibition of miR-216a either  
398 alone or in combination with KRAS can lead to a greater attenuation of tumor growth and an  
399 increase in overall survival in PDAC.

400

401 In summary, our results reveal for the first time a pancreas-specific miRNA (miR-216a) with  
402 physiological roles in both endocrine and exocrine cells, and show how dysregulation of miR-  
403 216a levels affect  $\beta$ -cell mass and pancreatic cancer initiation. miR-216a is upregulated by  
404 TGF- $\beta$  signalling and pancreata of miR-216a KO mice harbor reduced size islets with reduced  
405  $\beta$ -cell mass. miR-216a regulates the expression of genes involved in cell cycle progression  
406 and proliferation and deletion of miR-216a reduces the incidence of neoplastic lesions in  
407 KRAS mutant mice. Our findings offer insights into how islet size and  $\beta$ -cell mass are  
408 regulated by a pancreas-specific miRNA and offer potential intervention opportunities to slow  
409  $\beta$ -cell death in diabetes. Furthermore, it opens up new possibilities to study the signalling  
410 pathways altered in PDAC patients. Finally, given the specificity of miR-216a for the  
411 pancreas, it provides biomarker opportunities to evaluate pancreatic disease status or  
412 progression.

413

414 **Materials and Methods**

415

416 **Generation of MiR-216a Knockout Mice.** The miR-216a KO ES cell line was generated by

417 the Wellcome Trust Sanger Institute<sup>22</sup> and the *miR-216a*<sup>-/-</sup> (miR-216a KO) mouse line was

418 generated by the Centre for Phenogenomics in Toronto, Canada. Briefly, two frozen miR-

419 216a KO ES cell (JM8A3 derived from C57BL/6N) clones (4H7 and 4H9) were purchased

420 from the Mutant Mouse Resource and Research Center (USA) and were expanded and

421 aggregated with diploid CD1 embryos. Coat color chimerism was scored and chimeras were

422 bred with albino B6N (B6N-*Tyr*<sup>c-Brd</sup>/BrdCrCrI) females to test germline transmission.

423 Successful germline transmission was confirmed with TaqMan qPCR of DNA prepared from

424 tail clips, using the following primers in two separate reactions (KO and WT allele). The KO

425 allele assay yields a 125 bp product. Forward: 5`AGT TCC TAT TCC GAA GTT CCT ATT

426 C 3`. Reverse: 5`AGA GGT TGA GGA CAG ACA GTA 3`. Probe (sense); TGG TCA TAG

427 CTG TTT CCT GAA CAC CA. Cycling conditions: 98°C, 30s; 40 cycles of 98°C, 5s; 56°C,

428 10s. The WT allele assay yields a 135 bp product. Forward: 5`GGC TAT GAG TTG GTT

429 TA 3`. Reverse: 5`GGA AAT TGC TCT GTT TAG 3`. Probe (antisense): CTG TGA GGA

430 ATG ATA GGG AC. Cycling conditions: 95°C, 30s; 35 cycles of 95°C, 5s; 59°C, 10s.

431 Reactions were performed using the iTaq Universal Probes Supermix (Bio-Rad #1725131,

432 Hercules, California, USA) on the CFX96 Touch Thermal Cycler (Bio-Rad 1855195). Both

433 probes were labelled with 6'-FAM.

434 *MiR-216a*<sup>-/-</sup> mice were crossed with WT C57BL/6 mice for at least 3 generations before use

435 in experiments and maintained on a C57BL/6 background obtained from the University of

436 British Columbia Animal Care Facility. In all experiments, aged-matched littermates of miR-

437 216a KO mice were used as controls. Mice were fed a chow diet (2918, Research Diets) and

438 were housed with a 12-h:12-h light-dark cycle with constant temperature and humidity and ad

439 libitum access to food and water. Body weight and blood glucose were measured after a 4-

440 hour morning fast. Blood was collected from the saphenous vein with heparin coated capillary

441 tubes. All procedures with animals were approved by the University of British Columbia  
442 Animal Care Committee and carried out in accordance with the Canadian Council on Animal  
443 Care guidelines. For high-fat-diet (HFD) studies, C57BL/6 wild-type littermates and miR-  
444 216a KO mice were fed a 60% HFD diet (D12492i, Research Diets, Cedarlane, Burlington,  
445 Canada) starting at 6-8 weeks of age for 8 weeks. LSL-KrasG12D<sup>58,59</sup> (Kras<sup>G12D</sup>) and  
446 Ptf1aCre<sup>60</sup> have been described previously<sup>35</sup> and were maintained on a mixed background.  
447 Leptin knock-out rats<sup>31</sup> and kidney capsule grafts obtained from mice and rats implanted with  
448 pancreatic progenitor cells<sup>21</sup> are described elsewhere.

449 **Metabolic Assessments.** All metabolic analyses were performed in conscious mice that were  
450 restrained during blood sampling. Blood glucose values were determined with a OneTouch  
451 Ultra 2 glucometer (LifeScan, Inc., Burnaby, Canada) measured from saphenous vein blood.  
452 Fasting (4 hours) glucose and body weight were monitored weekly. For glucose tolerance  
453 tests with chow-diet or HFD fed mice, 6 hour fasted mice were given 2 g/kg glucose either by  
454 intraperitoneal injection or oral gavage, and blood was collected into heparin-coated capillary  
455 tubes at indicated times following glucose administration. For insulin tolerance tests, 4 hour  
456 fasted mice were injected intraperitoneally with 0.75 U/kg insulin (Novolin ge Toronto, Novo  
457 Nordisk Canada, Mississauga, Canada), with glucose measures at indicated times following  
458 glucose administration.

459 **Islet Isolation.** Mouse islets were isolated as previously described<sup>61</sup> using Type XI  
460 collagenase (1000 units/mL; #C7657, Sigma-Aldrich, St. Louis, MO). Following digestion  
461 and filtration, islets were picked with a pipette in three rounds to >95% purity. Islets were  
462 cultured overnight in RPMI-1640 (Sigma-Aldrich, St. Louis, MO) supplemented with 10%  
463 FBS (#F1051, Sigma-Aldrich, St. Louis, MO), 100 units/mL penicillin and 100 µg/mL  
464 streptomycin. For glucose stimulated insulin secretion assays, the next day after isolation 30  
465 islets per mouse were placed in 24-well plates with KRBB buffer (129 mM NaCl, 4.8 mM  
466 KCl, 1.2 mM MgSO<sub>4</sub>, 1.2 mM KH<sub>2</sub>PO<sub>4</sub>, 2.5 mM CaCl<sub>2</sub>, 5.0 mM NaHCO<sub>3</sub>, 10 mM HEPES,

467 0.5 % BSA, pH: 7.4) supplemented with 2.8 mM Glucose (low-Glucose). After one hour of  
468 incubation at 37°C, media was discarded. Islets were then serially placed in low Glucose (2.8  
469 mM Glucose) KRBB buffer, high Glucose (16.7 mM) KRBB buffer and 20 mM KCl for 1  
470 hour at 37°C. At the end of each incubation media was collected, centrifuged and stored at -  
471 20°C. Following the last media collection, islets were lysed in 0.18 M HCl/70% ethanol,  
472 homogenized, then incubated again at -20°C overnight. Following centrifugation, the  
473 aqueous solution was neutralized 1:2 with 1 M Tris, pH 7.5.

474 **Cell Culture.** The INS-1 rat insulinoma cell line was cultured in RPMI-1640 containing 11.2  
475 mM glucose and 2 mM L-glutamine. The medium was supplemented with 10% fetal bovine  
476 serum, 1 mM sodium pyruvate (#S8636, Sigma-Aldrich), 10 mM HEPES, 50 µM 2-  
477 mercaptoethanol (Sigma Aldrich), 100 U/mL penicillin (Sigma Aldrich), and 100 µg/mL  
478 streptomycin (Sigma Aldrich). PANC-1 cells were cultured in DMEM media (Life  
479 Technologies) containing 4 mM L-glutamine, 4500 mg/L glucose, 1 mM sodium pyruvate,  
480 and 1500 mg/L sodium bicarbonate supplemented with 10% fetal bovine serum, 100 U/ml  
481 penicillin, and 100 µg/ml streptomycin. EndoC-βH1 cells provided by (Drs. R Scharfmann,  
482 and P. Ravassard) were cultured on ECM-fibronectin-coated (1% and 2 µg/ml, respectively)  
483 (Sigma-Aldrich) culture wells and maintained in DMEM (Sigma Aldrich) that contained 5.6  
484 mM glucose, 2% BSA fraction V (Roche Diagnostics), 50 µM 2-mercaptoethanol, 10 mM  
485 nicotinamide (Sigma-Aldrich), 5.5 µg/ml transferrin (Sigma-Aldrich), 6.7 ng/ml selenite  
486 (Sigma-Aldrich), 100 U/ml penicillin, and 100 µg/ml streptomycin. For transfections, cells  
487 were plated on 6-well plates (unless stated otherwise), and the next day 50-70% confluent  
488 cells were transfected with miR-216a (50 nM) and miRNA controls (50 nM) using RNAimax  
489 (Life Technologies) following manufacturer's instructions. To control for tranfection effects,  
490 at least 3 wells were left untransfected. The protocol for differentiating CA1S human ES cells  
491 into pancreatic endocrine cells was described elsewhere<sup>19</sup>.



492

493 **Cloning.** miRNA-GFP expression vectors were generated by initially creating a EGFP  
494 expression vector, pScamp EF1a-EGFP, which contains the 5' end of the human EF1A gene  
495 (a genomic PCR amplicon containing 1407 bp of proximal promoter, exon 1, intron 1, and the  
496 UTR of exon 2), followed by the EGFP ORF and SV40 poly(A) signal, all cloned into  
497 pBluescript. This was subsequently modified into a "miRtron" expression vector, pScamp  
498 EF1a-premir-216a-EGFP, by removing 450 bp of the middle EF1A intron with restriction  
499 endonucleases BfuAI and XhoI, and replacing it with a compatible BsmBI-SalI restriction  
500 fragment of a 575-bp amplicon\* consisting of the full hsa-premir-216a sequence, flanked on  
501 either side by roughly 200 bp of endogenous genomic sequences. Cells transfected with this  
502 plasmid produce a chimeric EF1A-EGFP mRNA that gets translated into a fluorescent  
503 protein, while the excised intron is processed into mature hsa-miR-216a.\* miRtron hsa-  
504 premir-216a cloning primers (BsmBI and XhoI 5' overhangs are underlined). Forward: 5'  
505 gggcacacaCGTCTCGACGCAGATTATACTTTTATGACATTACATGCAATATAGC 3';  
506 Reverse: 5' cacacaGTCGACCCAAGTAGCACTGAAGGAGCG 3'.

507 **Pancreas Immunohistochemistry and Histology.** Pancreata were fixed overnight in 4%  
508 paraformaldehyde (PFA) and then stored in 70% EtOH prior to paraffin embedding and  
509 sectioning (5 µm thickness; Wax-it Histology Services; Vancouver, BC). Immunofluorescent  
510 staining was performed as previously described<sup>62</sup>. Briefly, slides were deparaffinized in  
511 xylene and hydrated by graded ethanol washes. Slides were then washed in phosphate-  
512 buffered saline (PBS) followed by 10–15 min incubation in 10 mM sodium citrate/0.05%  
513 Tween 20, pH 6.0 at 95°C. Slides were incubated with DAKO Protein Block Serum-Free  
514 (Agilent Technologies, Inc, Santa Clara, CA) at room temperature for 10 minutes and then  
515 with the primary antibodies diluted in Dako Antibody Diluent (Agilent Technologies, Inc.)  
516 overnight at 4°C. The following primary antibodies were used: insulin (Cell Signalling, #

517 3014 at 1:200), glucagon (Sigma Aldrich, #G2654 at 1:1000), synaptophysin (Monosan,  
518 #MON9013 at 1:10), and PCNA (BD Transduction, #610665 at 1:100). The next day slides  
519 were serially washed with PBS and were incubated in appropriate Alexa Fluor 488 or 594  
520 secondary antibodies (Thermo Fisher Scientific, Waltham, MA) diluted in Dako Antibody  
521 Diluent. Following serial PBS washes, slides were coverslipped with VECTASHIELD  
522 HardSet Mounting Medium with DAPI (Vector Laboratories, Burlingame, CA). Images were  
523 captured using a ImageXpress Micro™ Imaging System and analyzed using MetaXpress  
524 5.3.0.5 Software (Molecular Devices Corporation, Sunnyvale, CA, USA).  $\beta$ -cell mass was  
525 analyzed in three pancreas sections per mouse, at least 200  $\mu\text{m}$  apart, on insulin-labeled  
526 sections. Islet size was quantified as the synaptophysin-positive area per islet. For the  $\alpha$ -cell  
527 analysis, glucagon-immunoreactive cells were counted using the ImageJ Cell Counter tool.  
528 Only islets with visible DAPI stained nuclei and at least 40 cells and 10 or more non- $\beta$  cells  
529 were used to determine periphery or core localization of  $\alpha$ -cells.  $\alpha$ -cells were considered to be  
530 in the periphery of the islet if they were within 2 outermost cell layers of the islet or the core  
531 if they were deeper than the 2 outermost cell layers of the islet. For the islet circularity  
532 analysis, islets stained with synaptophysin and DAPI were used. Only islets with at least 40  
533 cells and 10 or more non- $\beta$  cells were used to determine islet circularity. All images were  
534 converted to 8-bit and non-islet nuclei were erased using ImageJ outline and clear function.  
535 Islet circularity was determined using Analyze Particles with threshold set until the entire area  
536 of islet was filled. H&E staining and Alcian blue staining on pancreatic sections were  
537 performed by Wax-it Histology Services Inc. (Vancouver, Canada).

538 **RNA Isolation and Quantitative RT-PCR.** Tissues were homogenized with an Ultra-Turrax  
539 and total RNA was isolated using the miRCURY RNA isolation kit (Exiqon, U.S.A) as per  
540 the manufacturer's instructions including a DNase (Life Technologies) treatment step.  
541 mRNA was reverse transcribed with iScript cDNA Synthesis Kit (Bio-Rad Laboratories,

542 Hercules, CA) and quantitative RT-PCR was performed using Ssofast EvaGreen Supermix  
543 (Bio-Rad). Primer sequences to amplify *Insulin*, *Pdx1*, *Nkx6.1*, and *Hprt* transcripts were  
544 described previously<sup>63</sup>. Primer sequences for *Glucagon* were Forward: 5`  
545 CGCAGGCACGCTGATG 3` Reverse: 5` ACGAGATGTTGTGAAGATGGTTG 3`. A  
546 human RNA panel was purchased from ThermoFisher Scientific (#AM6000). miRNA was  
547 reverse transcribed with a Universal cDNA synthesis kit (Exiqon, U.S.A) and qRT-PCR was  
548 performed using SYBR Green master mix (Exiqon, U.S.A) with LNA-based miRNA primers  
549 (Exiqon, U.S.A). Relative values were calculated by the quantified by the  $2^{-\Delta\Delta CT}$  method.  
550 RNA from the pancreata of 1-day old mice was isolated using a protocol specific for  
551 pancreatic RNA isolations<sup>64</sup>.

552 ***In situ* Hybridization.** Human fetal pancreata were kindly provided by Dr. Renian Wang,  
553 University of Western Ontario, London, Canada and were described elsewhere<sup>20</sup>. Human  
554 adult pancreas was provided by the Irving K. Barber Human Islet Isolation Laboratory  
555 (Vancouver, British Columbia) with consent to use for research purposes. All samples were  
556 fixed overnight in 4% PFA, embedded in paraffin and sectioned (5  $\mu$ m thickness; Wax-it  
557 Histology Services; Vancouver, BC). Slides were de-paraffinized with three consecutive  
558 xylene washes, rehydrated with graded ethanol washes (100% x 3, 95%, 70%, each 5  
559 minutes), and washed in diethylpyrocarbonate (DEPC)-treated water. *In situ* hybridization  
560 was carried out with a IsHyb *In Situ* Hybridization kit (Biochain, San Francisco, California).  
561 Sections were fixed with 4% PFA for 20 minutes, washed twice with DEPC-treated PBS, and  
562 treated with 10  $\mu$ g/mL Proteinase K (Sigma Aldrich) at 37°C for 15 minutes. Slides were  
563 washed with DEPC-treated PBS, fixed again with PFA for 15 minutes, and washed with  
564 DEPC-treated water. Sections were incubated for 4 hours at 50°C in pre-hybridization  
565 solution (Biochain). Afterwards, pancreatic sections were incubated with DIG-labeled hsa-  
566 miR-216a miRCURY LNA detection probe (#38495-15, Exiqon) or control scrambled

567 miRNA probe (#99004-15, Exiqon) at 0.25 ng/ $\mu$ L in hybridization solution (Biochain) for 14  
568 hours at 45°C. Then, slides were washed in SSC buffer (Biochain) as follows: 2X SSC buffer,  
569 2x10 min, 45°C; 1.5X SSC buffer, 1x10min, 45°C; 2x SSC buffer, 2x20 minutes, 37°C. After  
570 washing steps, sections were incubated with 1X blocking solution (Biochain) in PBS for 1  
571 hour. Slides were incubated overnight with alkaline-phosphate conjugated anti-digoxinogen  
572 antibody (diluted 1:500 in PBS) (Biochain) at 4°C. The following day, slides were washed  
573 three times with PBS for 10 minutes, twice with alkaline phosphatase buffer (Biochain) for 5  
574 minutes, and incubated with nitro-blue tetrazolium chloride (NBT) and 5-bromo-4-chloro-3'-  
575 indolyphosphate p-toluidine salt (BCIP) solution (6.6  $\mu$ L NBT and 3.3  $\mu$ L BCIP were diluted  
576 in 1 mL alkaline phosphatase buffer) (Biochain) for 20 hours at room temperature. Slides  
577 were scanned using a ScanScope CS system (Aperio; Vista, CA).

578 **Assays.** Insulin was measured in plasma, islets and cell culture media using a Mouse  
579 Ultrasensitive Insulin ELISA (ALPCO, Salem, NH). Proinsulin was measured from plasma  
580 collected from cardiac blood using Rat/Mouse Proinsulin ELISA (Merckodia, Sweden). To  
581 perform migration assay with cultured cell lines, PANC-1 cells were transfected with the  
582 miR-216a and control scrambled miRNA mimetics (Dharmacon, Lafayette, CO) and 24 hours  
583 later, seeded on trans-well migration chambers (Trevigen, Gaithersburg, MD) in media  
584 without FBS. Cells were allowed to migrate for 16 hours and the number of cells transversing  
585 the boyer chamber was quantified by incubating the cells in the bottom chamber with Calcein-  
586 AM for one hour and measuring the fluorescence at 485 nm excitation, 520 nm emission with  
587 a Tecan Plate Reader. For the XTT (2,3-bis-(2-methoxy-4-nitro-5-sulfophenyl)-2H-  
588 tetrazolium-5-carboxanilide) assay, cells were transfected with miR-216a and the control  
589 miRNAs and an XTT assay was performed 3 days post-transfection in 96-well plates. XTT  
590 (Life Technologies) was dissolved in pre-warmed 37°C cell culture media at 1 mg/mL and  
591 stock Phenazine methosulfate (PMS) solution was prepared in PBS at 10 mM. PMS was

592 mixed with the XTT solution immediately before labeling the cells and 25  $\mu$ L of XTT/PMS  
593 solution was directly added to each well containing 100  $\mu$ L cell culture media. Cells were  
594 incubated for two hours at 37°C in a CO<sub>2</sub> incubator. Absorbance was read at 450 nm using a  
595 Tecan Plate Reader. For live cell imaging, INS-1 cells seeded on 96-well plates were  
596 transfected with control or miR-216a expressing plasmids or left untreated. Two days after  
597 transfection, cells were incubated with 50 ng/mL Hoechst and 1:500 diluted Alexa647  
598 annexinV 30 min prior to imaging. TNF- $\alpha$ , IFN- $\gamma$  and IL-1 $\beta$  (10 ng/mL each) was added to  
599 media and cells were imaged every 2 hours at 37°C and 5% CO<sub>2</sub> in an ImageXpress Micro™  
600 (Molecular Devices).

601 **RNA Sequencing and Analysis.** RNA sequencing was performed by the Biomedical  
602 Research Center Genomics facility at the University of British Columbia, Vancouver, Canada.  
603 Sample quality control was assessed using an Agilent 2100 Bioanalyzer. Qualifying samples  
604 (samples with RNA integrity numbers > 8) were then prepared following the standard  
605 protocol for the NEBnext Ultra ii Stranded mRNA (New England Biolabs). Sequencing was  
606 performed on the Illumina NextSeq 500 with Paired End 42bp  $\times$  42bp reads. Sequencing data  
607 were demultiplexed using Illumina's bcl2fastq2.

608 Fastq files were retrieved from Illumina Basespace and aligned with salmon<sup>65</sup> (version 0.13.1)  
609 to the most current Ensembl Mus Musculus genome (as of 2019-05-08)<sup>66</sup> using the gcBias,  
610 validateMappings, and rangeFactorizationBins (with 4 as the binning parameter) options.  
611 Quality of the Fastq files was assessed using FastQC<sup>67</sup> (version 0.11.8). All fastq files passed  
612 quality control. All further analyses were performed in R (version 3.6.0)<sup>68</sup>. Counts were  
613 imported using the tximport package (version 1.12.0)<sup>69</sup> and the biomaRt package (version  
614 0.8.0)<sup>70,71</sup>. Analysis of differentially expressed genes was performed using the DESeq2  
615 (version 1.24.0)<sup>72</sup>. Genes with less than 5 counts in 2 samples or fewer were dropped from the  
616 analysis. Gene Ontology analysis was performed on genes with an IQR greater than 0.5 across

617 all samples and an adjusted p value < 0.05 (adjusted by Benjamini-Hochberg method)  
618 between wild type and control mice. Significantly enriched terms for Biological Process,  
619 Cellular Components, and Molecular Functions were identified using the categoryCompare  
620 package (version 1.28.0)<sup>73</sup> and visualized using Cytoscape via the RCy3 package (version  
621 2.4.0)<sup>74</sup>. Further KEGG network analyses were performed using the gage (version 2.34.0)<sup>75</sup>  
622 and pathview (version 1.24.0) packages<sup>76</sup>. Finally, GO terms were summarized using the  
623 REViGO methodology<sup>77</sup> and plotted using the treemap (version 2.4.2) package<sup>78</sup>. All R  
624 scripts and data are available upon request.

625 **Statistical Analyses.** Statistical analyses were performed using GraphPad Prism 7, with  
626 significance defined as  $p < 0.05$ . Unless specified in the figure legend, student`s t-tests were  
627 used for normally distributed data (two-tailed, unpaired). Bonferroni correction was used to  
628 correct for multiple comparisons, where applicable. Data are represented by bar plots with  
629 individual values indicated, individual values only, or line graphs. Results show mean $\pm$ SEM.

630 **Acknowledgements**

631 We thank Dr. Anna D'Souza for providing islets from Leptin knock-out rats. T.J.K. gratefully  
632 acknowledges funding from JDRF and the Canadian Institutes for Health Research for this research.  
633 S.E. is a recipient of a JDRF advanced postdoctoral fellowship. We would also like to thank Dr. Ziliang  
634 Ao and Dr. Garth L. Warnock from the Irving K. Barber Human Islet Isolation Laboratory (Vancouver,  
635 BC) for providing human islets.

636

637 **Disclosure Statement:** The authors have nothing to disclose.

638

## 639 References

640

- 641 1 Brissova, M. *et al.* Assessment of human pancreatic islet architecture and composition  
642 by laser scanning confocal microscopy. *J Histochem Cytochem* **53**, 1087-1097,  
643 doi:10.1369/jhc.5C6684.2005 (2005).
- 644 2 American Diabetes, A. Diagnosis and classification of diabetes mellitus. *Diabetes*  
645 *Care* **33 Suppl 1**, S62-69, doi:10.2337/dc10-S062 (2010).
- 646 3 Storz, P. Acinar cell plasticity and development of pancreatic ductal adenocarcinoma.  
647 *Nat Rev Gastroenterol Hepatol* **14**, 296-304, doi:10.1038/nrgastro.2017.12 (2017).
- 648 4 Bartel, D. P. MicroRNAs: genomics, biogenesis, mechanism, and function. *Cell* **116**,  
649 281-297 (2004).
- 650 5 Carthew, R. W. & Sontheimer, E. J. Origins and Mechanisms of miRNAs and  
651 siRNAs. *Cell* **136**, 642-655, doi:10.1016/j.cell.2009.01.035 (2009).
- 652 6 Godard, P. & van Eyll, J. Pathway analysis from lists of microRNAs: common pitfalls  
653 and alternative strategy. *Nucleic Acids Res* **43**, 3490-3497, doi:10.1093/nar/gkv249  
654 (2015).
- 655 7 Akhtar, M. M., Micolucci, L., Islam, M. S., Olivieri, F. & Procopio, A. D.  
656 Bioinformatic tools for microRNA dissection. *Nucleic Acids Res* **44**, 24-44,  
657 doi:10.1093/nar/gkv1221 (2016).
- 658 8 Londin, E. *et al.* Analysis of 13 cell types reveals evidence for the expression of  
659 numerous novel primate- and tissue-specific microRNAs. *Proc Natl Acad Sci U S A*  
660 **112**, E1106-1115, doi:10.1073/pnas.1420955112 (2015).
- 661 9 Chiang, H. R. *et al.* Mammalian microRNAs: experimental evaluation of novel and  
662 previously annotated genes. *Genes Dev* **24**, 992-1009, doi:10.1101/gad.1884710  
663 (2010).
- 664 10 Lynn, F. C. *et al.* MicroRNA expression is required for pancreatic islet cell genesis in  
665 the mouse. *Diabetes* **56**, 2938-2945, doi:10.2337/db07-0175 (2007).
- 666 11 Mandelbaum, A. D. *et al.* Dysregulation of Dicer1 in beta cells impairs islet  
667 architecture and glucose metabolism. *Exp Diabetes Res* **2012**, 470302,  
668 doi:10.1155/2012/470302 (2012).
- 669 12 Kalis, M. *et al.* Beta-cell specific deletion of Dicer1 leads to defective insulin  
670 secretion and diabetes mellitus. *PLoS One* **6**, e29166,  
671 doi:10.1371/journal.pone.0029166 (2011).
- 672 13 Martinez-Sanchez, A., Nguyen-Tu, M. S. & Rutter, G. A. DICER Inactivation  
673 Identifies Pancreatic beta-Cell "Disallowed" Genes Targeted by MicroRNAs. *Mol*  
674 *Endocrinol* **29**, 1067-1079, doi:10.1210/me.2015-1059 (2015).
- 675 14 Wang, Y. J. *et al.* Dicer is required for maintenance of adult pancreatic acinar cell  
676 identity and plays a role in Kras-driven pancreatic neoplasia. *PLoS One* **9**, e113127,  
677 doi:10.1371/journal.pone.0113127 (2014).
- 678 15 Niehrs, C. & Pollet, N. Synexpression groups in eukaryotes. *Nature* **402**, 483-487,  
679 doi:10.1038/990025 (1999).
- 680 16 Sun, K. & Lai, E. C. Adult-specific functions of animal microRNAs. *Nat Rev Genet*  
681 **14**, 535-548, doi:10.1038/nrg3471 (2013).
- 682 17 van Rooij, E. *et al.* A signature pattern of stress-responsive microRNAs that can evoke  
683 cardiac hypertrophy and heart failure. *Proc Natl Acad Sci U S A* **103**, 18255-18260,  
684 doi:10.1073/pnas.0608791103 (2006).
- 685 18 Esquela-Kerscher, A. & Slack, F. J. Oncomirs - microRNAs with a role in cancer. *Nat*  
686 *Rev Cancer* **6**, 259-269, doi:10.1038/nrc1840 (2006).
- 687 19 Bruin, J. E. *et al.* Characterization of polyhormonal insulin-producing cells derived in  
688 vitro from human embryonic stem cells. *Stem Cell Res* **12**, 194-208,  
689 doi:10.1016/j.scr.2013.10.003 (2014).



- 690 20 Riedel, M. J. *et al.* Immunohistochemical characterisation of cells co-producing  
691 insulin and glucagon in the developing human pancreas. *Diabetologia* **55**, 372-381,  
692 doi:10.1007/s00125-011-2344-9 (2012).
- 693 21 Bruin, J. E. *et al.* Accelerated Maturation of Human Stem Cell-Derived Pancreatic  
694 Progenitor Cells into Insulin-Secreting Cells in Immunodeficient Rats Relative to  
695 Mice. *Stem Cell Reports* **5**, 1081-1096, doi:10.1016/j.stemcr.2015.10.013 (2015).
- 696 22 Prosser, H. M., Koike-Yusa, H., Cooper, J. D., Law, F. C. & Bradley, A. A resource of  
697 vectors and ES cells for targeted deletion of microRNAs in mice. *Nat Biotechnol* **29**,  
698 840-845, doi:10.1038/nbt.1929 (2011).
- 699 23 Jo, J. *et al.* Formation of pancreatic islets involves coordinated expansion of small  
700 islets and fission of large interconnected islet-like structures. *Biophys J* **101**, 565-574,  
701 doi:10.1016/j.bpj.2011.06.042 (2011).
- 702 24 Miettinen, P. J. *et al.* Impaired migration and delayed differentiation of pancreatic islet  
703 cells in mice lacking EGF-receptors. *Development* **127**, 2617-2627 (2000).
- 704 25 Greiner, T. U., Kesavan, G., Stahlberg, A. & Semb, H. Rac1 regulates pancreatic islet  
705 morphogenesis. *BMC Dev Biol* **9**, 2, doi:10.1186/1471-213X-9-2 (2009).
- 706 26 Ritvos, O. *et al.* Activin disrupts epithelial branching morphogenesis in developing  
707 glandular organs of the mouse. *Mech Dev* **50**, 229-245 (1995).
- 708 27 Kato, M. *et al.* TGF-beta activates Akt kinase through a microRNA-dependent  
709 amplifying circuit targeting PTEN. *Nat Cell Biol* **11**, 881-889, doi:10.1038/ncb1897  
710 (2009).
- 711 28 Xia, H., Ooi, L. L. & Hui, K. M. MicroRNA-216a/217-induced epithelial-  
712 mesenchymal transition targets PTEN and SMAD7 to promote drug resistance and  
713 recurrence of liver cancer. *Hepatology* **58**, 629-641, doi:10.1002/hep.26369 (2013).
- 714 29 Xu, J., Lamouille, S. & Derynck, R. TGF-beta-induced epithelial to mesenchymal  
715 transition. *Cell Res* **19**, 156-172, doi:10.1038/cr.2009.5 (2009).
- 716 30 LaPierre, M. P. & Stoffel, M. MicroRNAs as stress regulators in pancreatic beta cells  
717 and diabetes. *Mol Metab* **6**, 1010-1023, doi:10.1016/j.molmet.2017.06.020 (2017).
- 718 31 D'Souza A, M., Asadi, A., Johnson, J. D., Covey, S. D. & Kieffer, T. J. Leptin  
719 deficiency in rats results in hyperinsulinemia and impaired glucose homeostasis.  
720 *Endocrinology* **155**, 1268-1279, doi:10.1210/en.2013-1523 (2014).
- 721 32 Poy, M. N. *et al.* A pancreatic islet-specific microRNA regulates insulin secretion.  
722 *Nature* **432**, 226-230, doi:10.1038/nature03076 (2004).
- 723 33 Erener, S., Mojibian, M., Fox, J. K., Denroche, H. C. & Kieffer, T. J. Circulating miR-  
724 375 as a biomarker of beta-cell death and diabetes in mice. *Endocrinology* **154**, 603-  
725 608, doi:10.1210/en.2012-1744 (2013).
- 726 34 Erener, S., Marwaha, A., Tan, R., Panagiotopoulos, C. & Kieffer, T. J. Profiling of  
727 circulating microRNAs in children with recent onset of type 1 diabetes. *JCI Insight* **2**,  
728 e89656, doi:10.1172/jci.insight.89656 (2017).
- 729 35 Kopp, J. L. *et al.* Identification of Sox9-dependent acinar-to-ductal reprogramming as  
730 the principal mechanism for initiation of pancreatic ductal adenocarcinoma. *Cancer*  
731 *Cell* **22**, 737-750, doi:10.1016/j.ccr.2012.10.025 (2012).
- 732 36 Guerra, C. *et al.* Chronic pancreatitis is essential for induction of pancreatic ductal  
733 adenocarcinoma by K-Ras oncogenes in adult mice. *Cancer Cell* **11**, 291-302,  
734 doi:10.1016/j.ccr.2007.01.012 (2007).
- 735 37 Hezel, A. F., Kimmelman, A. C., Stanger, B. Z., Bardeesy, N. & Depinho, R. A.  
736 Genetics and biology of pancreatic ductal adenocarcinoma. *Genes Dev* **20**, 1218-1249,  
737 doi:10.1101/gad.1415606 (2006).
- 738 38 Kanda, M. *et al.* Presence of somatic mutations in most early-stage pancreatic  
739 intraepithelial neoplasia. *Gastroenterology* **142**, 730-733 e739,  
740 doi:10.1053/j.gastro.2011.12.042 (2012).

- 741 39 Hingorani, S. R. *et al.* Preinvasive and invasive ductal pancreatic cancer and its early  
742 detection in the mouse. *Cancer Cell* **4**, 437-450 (2003).
- 743 40 Morris, J. P. t., Cano, D. A., Sekine, S., Wang, S. C. & Hebrok, M. Beta-catenin  
744 blocks Kras-dependent reprogramming of acini into pancreatic cancer precursor  
745 lesions in mice. *J Clin Invest* **120**, 508-520, doi:10.1172/JCI40045 (2010).
- 746 41 Zhu, L., Shi, G., Schmidt, C. M., Hruban, R. H. & Konieczny, S. F. Acinar cells  
747 contribute to the molecular heterogeneity of pancreatic intraepithelial neoplasia. *Am J*  
748 *Pathol* **171**, 263-273, doi:10.2353/ajpath.2007.061176 (2007).
- 749 42 Seymour, P. A. *et al.* SOX9 is required for maintenance of the pancreatic progenitor  
750 cell pool. *Proc Natl Acad Sci U S A* **104**, 1865-1870, doi:10.1073/pnas.0609217104  
751 (2007).
- 752 43 Prevot, P. P. *et al.* Role of the ductal transcription factors HNF6 and Sox9 in  
753 pancreatic acinar-to-ductal metaplasia. *Gut* **61**, 1723-1732, doi:10.1136/gutjnl-2011-  
754 300266 (2012).
- 755 44 Shroff, S. *et al.* SOX9: a useful marker for pancreatic ductal lineage of pancreatic  
756 neoplasms. *Hum Pathol* **45**, 456-463, doi:10.1016/j.humpath.2013.10.008 (2014).
- 757 45 Poy, M. N. *et al.* miR-375 maintains normal pancreatic alpha- and beta-cell mass.  
758 *Proc Natl Acad Sci U S A* **106**, 5813-5818, doi:10.1073/pnas.0810550106 (2009).
- 759 46 Biton, M. *et al.* Epithelial microRNAs regulate gut mucosal immunity via epithelium-  
760 T cell crosstalk. *Nat Immunol* **12**, 239-246, doi:10.1038/ni.1994 (2011).
- 761 47 Kang, W. *et al.* miR-375 is involved in Hippo pathway by targeting YAP1/TEAD4-  
762 CTGF axis in gastric carcinogenesis. *Cell Death Dis* **9**, 92, doi:10.1038/s41419-017-  
763 0134-0 (2018).
- 764 48 Goodwin, D. *et al.* Evaluation of miR-216a and miR-217 as potential biomarkers of  
765 acute pancreatic injury in rats and mice. *Biomarkers* **19**, 517-529,  
766 doi:10.3109/1354750X.2014.944217 (2014).
- 767 49 Szafranska, A. E. *et al.* MicroRNA expression alterations are linked to tumorigenesis  
768 and non-neoplastic processes in pancreatic ductal adenocarcinoma. *Oncogene* **26**,  
769 4442-4452, doi:10.1038/sj.onc.1210228 (2007).
- 770 50 Yang, J. Y. *et al.* MicroRNAs in stool samples as potential screening biomarkers for  
771 pancreatic ductal adenocarcinoma cancer. *Am J Cancer Res* **4**, 663-673 (2014).
- 772 51 Otto, T. & Sicinski, P. Cell cycle proteins as promising targets in cancer therapy. *Nat*  
773 *Rev Cancer* **17**, 93-115, doi:10.1038/nrc.2016.138 (2017).
- 774 52 Feldmann, G., Beaty, R., Hruban, R. H. & Maitra, A. Molecular genetics of pancreatic  
775 intraepithelial neoplasia. *J Hepatobiliary Pancreat Surg* **14**, 224-232,  
776 doi:10.1007/s00534-006-1166-5 (2007).
- 777 53 LaPak, K. M. & Burd, C. E. The molecular balancing act of p16(INK4a) in cancer and  
778 aging. *Mol Cancer Res* **12**, 167-183, doi:10.1158/1541-7786.MCR-13-0350 (2014).
- 779 54 Schutte, M. *et al.* Abrogation of the Rb/p16 tumor-suppressive pathway in virtually all  
780 pancreatic carcinomas. *Cancer Res* **57**, 3126-3130 (1997).
- 781 55 Shen, W. *et al.* TGF-beta in pancreatic cancer initiation and progression: two sides of  
782 the same coin. *Cell Biosci* **7**, 39, doi:10.1186/s13578-017-0168-0 (2017).
- 783 56 Smith, B., Agarwal, P. & Bhowmick, N. A. MicroRNA applications for prostate,  
784 ovarian and breast cancer in the era of precision medicine. *Endocr Relat Cancer* **24**,  
785 R157-R172, doi:10.1530/ERC-16-0525 (2017).
- 786 57 Kamerkar, S. *et al.* Exosomes facilitate therapeutic targeting of oncogenic KRAS in  
787 pancreatic cancer. *Nature* **546**, 498-503, doi:10.1038/nature22341 (2017).
- 788 58 Tuveson, D. A. *et al.* Endogenous oncogenic K-ras(G12D) stimulates proliferation and  
789 widespread neoplastic and developmental defects. *Cancer Cell* **5**, 375-387 (2004).
- 790 59 Johnson, L. *et al.* Somatic activation of the K-ras oncogene causes early onset lung  
791 cancer in mice. *Nature* **410**, 1111-1116, doi:10.1038/35074129 (2001).

- 792 60 Kawaguchi, Y. *et al.* The role of the transcriptional regulator Ptf1a in converting  
793 intestinal to pancreatic progenitors. *Nat Genet* **32**, 128-134, doi:10.1038/ng959 (2002).
- 794 61 Salvalaggio, P. R. *et al.* Islet filtration: a simple and rapid new purification procedure  
795 that avoids ficoll and improves islet mass and function. *Transplantation* **74**, 877-879,  
796 doi:10.1097/01.TP.0000028781.41729.5B (2002).
- 797 62 Asadi, A., Bruin, J. E. & Kieffer, T. J. Characterization of Antibodies to Products of  
798 Proinsulin Processing Using Immunofluorescence Staining of Pancreas in Multiple  
799 Species. *J Histochem Cytochem* **63**, 646-662, doi:10.1369/0022155415576541 (2015).
- 800 63 Glavas, M. M. *et al.* Early overnutrition reduces Pdx1 expression and induces beta cell  
801 failure in Swiss Webster mice. *Sci Rep* **9**, 3619, doi:10.1038/s41598-019-39177-3  
802 (2019).
- 803 64 Azevedo-Pouly, A. C., Elgamal, O. A. & Schmittgen, T. D. RNA isolation from  
804 mouse pancreas: a ribonuclease-rich tissue. *J Vis Exp*, e51779, doi:10.3791/51779  
805 (2014).
- 806 65 Patro, R., Duggal, G., Love, M. I., Irizarry, R. A. & Kingsford, C. Salmon provides  
807 fast and bias-aware quantification of transcript expression. *Nat Methods* **14**, 417-419,  
808 doi:10.1038/nmeth.4197 (2017).
- 809 66 Zerbino, D. R. *et al.* Ensembl 2018. *Nucleic Acids Res* **46**, D754-D761,  
810 doi:10.1093/nar/gkx1098 (2018).
- 811 67 S., A. *FastQC: a quality control tool for high throughput sequence data*,  
812 <<http://www.bioinformatics.babraham.ac.uk/projects/fastqc>> (2010).
- 813 68 Team, R. C. R. *A language and environment for statistical computing. R Foundation  
814 for Statistical Computing, Vienna, Austria*, <<https://www.R-project.org/>> (2019).
- 815 69 Sonesson, C., Love, M. I. & Robinson, M. D. Differential analyses for RNA-seq:  
816 transcript-level estimates improve gene-level inferences. *F1000Res* **4**, 1521,  
817 doi:10.12688/f1000research.7563.2 (2015).
- 818 70 Durinck, S. *et al.* BioMart and Bioconductor: a powerful link between biological  
819 databases and microarray data analysis. *Bioinformatics* **21**, 3439-3440,  
820 doi:10.1093/bioinformatics/bti525 (2005).
- 821 71 Durinck, S., Spellman, P. T., Birney, E. & Huber, W. Mapping identifiers for the  
822 integration of genomic datasets with the R/Bioconductor package biomaRt. *Nat  
823 Protoc* **4**, 1184-1191, doi:10.1038/nprot.2009.97 (2009).
- 824 72 Love, M. I., Huber, W. & Anders, S. Moderated estimation of fold change and  
825 dispersion for RNA-seq data with DESeq2. *Genome Biol* **15**, 550,  
826 doi:10.1186/s13059-014-0550-8 (2014).
- 827 73 Flight, R. M. *et al.* categoryCompare, an analytical tool based on feature annotations.  
828 *Front Genet* **5**, 98, doi:10.3389/fgene.2014.00098 (2014).
- 829 74 Ono, K., Muetze, T., Kolishovski, G., Shannon, P. & Demchak, B. CyREST:  
830 Turbocharging Cytoscape Access for External Tools via a RESTful API. *F1000Res* **4**,  
831 478, doi:10.12688/f1000research.6767.1 (2015).
- 832 75 Luo, W., Friedman, M. S., Shedden, K., Hankenson, K. D. & Woolf, P. J. GAGE:  
833 generally applicable gene set enrichment for pathway analysis. *BMC Bioinformatics*  
834 **10**, 161, doi:10.1186/1471-2105-10-161 (2009).
- 835 76 Luo, W. & Brouwer, C. Pathview: an R/Bioconductor package for pathway-based data  
836 integration and visualization. *Bioinformatics* **29**, 1830-1831,  
837 doi:10.1093/bioinformatics/btt285 (2013).
- 838 77 Supek, F., Bosnjak, M., Skunca, N. & Smuc, T. REVIGO summarizes and visualizes  
839 long lists of gene ontology terms. *PLoS One* **6**, e21800,  
840 doi:10.1371/journal.pone.0021800 (2011).
- 841 78 Tennekes, M. treemap: Treemap Visualization. R package version 2.4-2. (2017).
- 842



# Figure 1

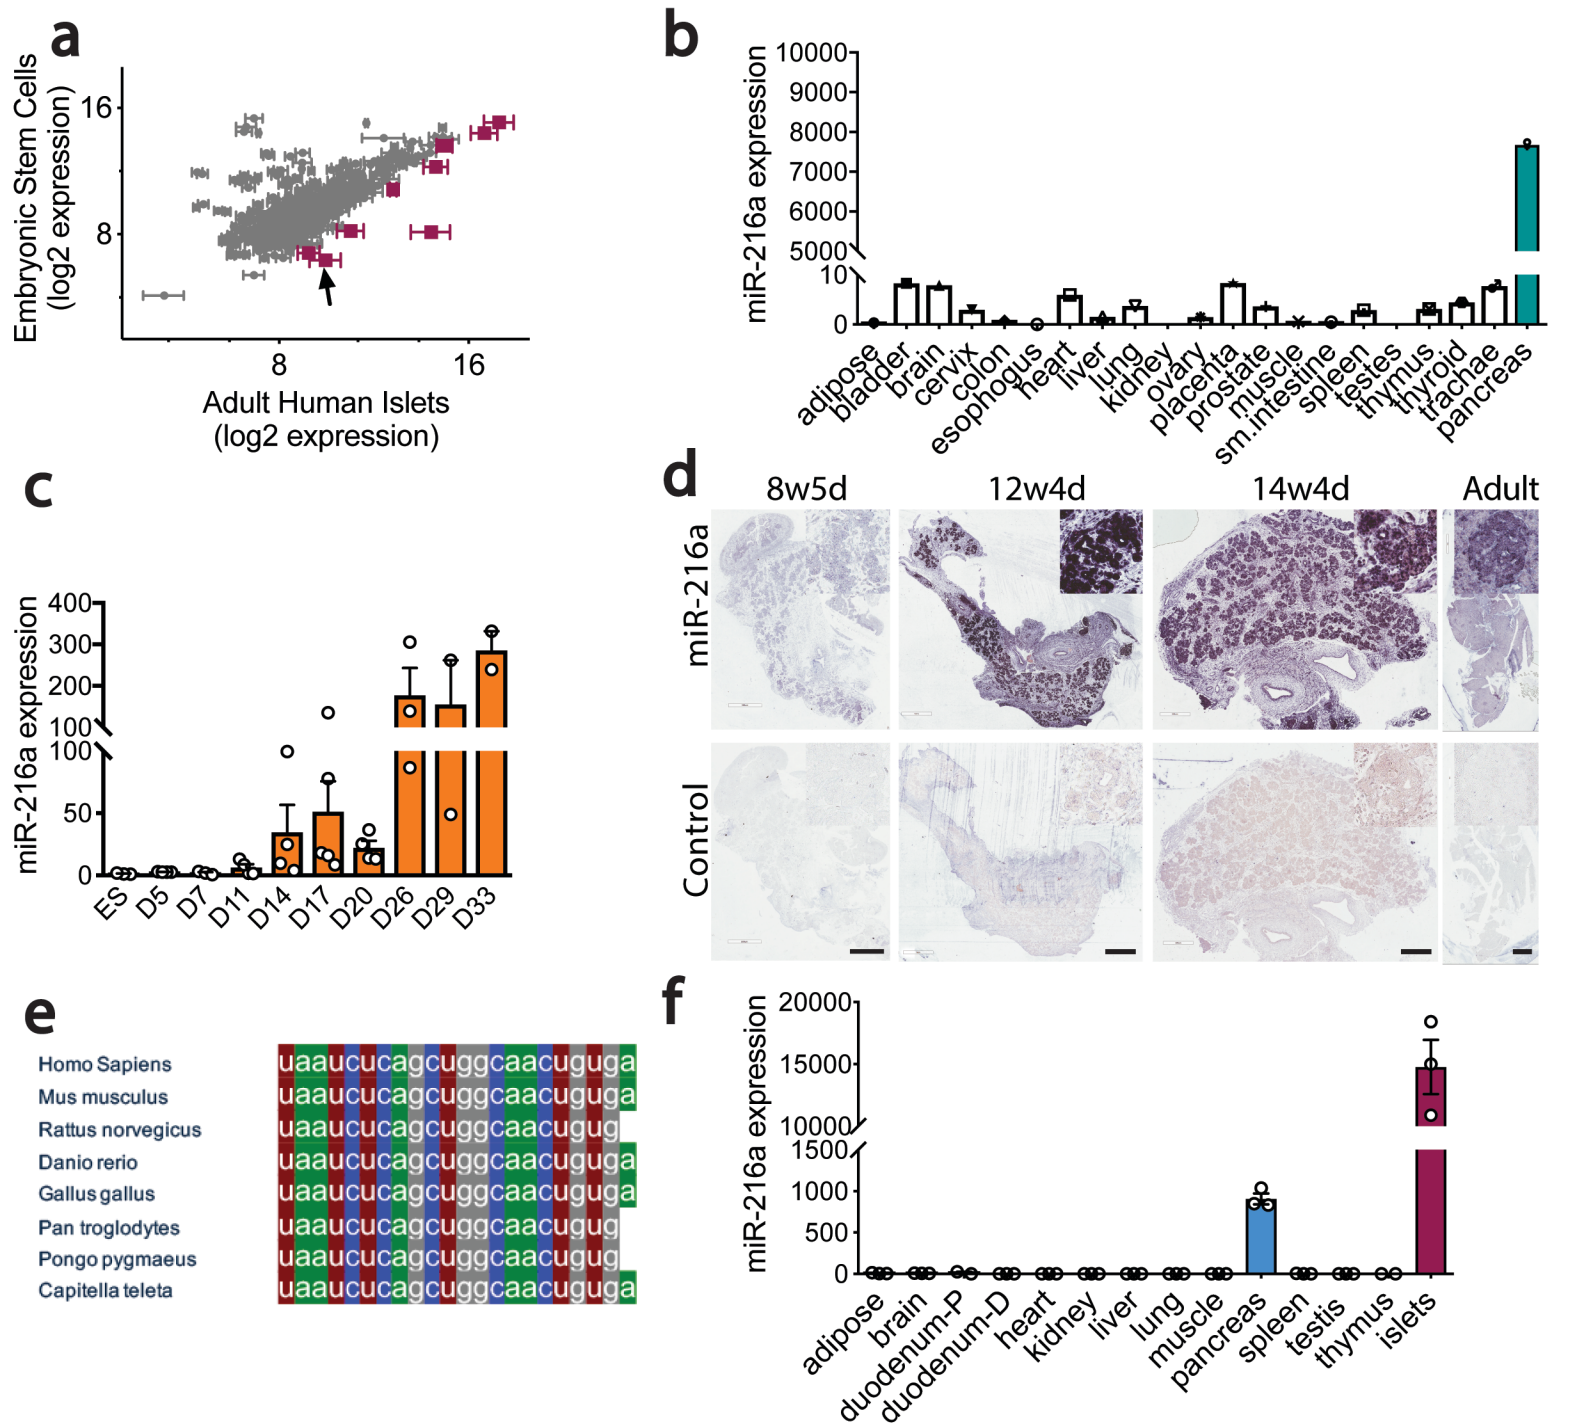

**Figure 1. miR-216a is enriched in pancreatic islets and is highly conserved among various species.** **a** miRNA profiling of adult human islets compared to human embryonic stem cells. miRNAs with greater than 3-fold increase in the islets are shown in red. Arrow points at miR-216a.  $n=3$ . Data represent mean log<sub>2</sub> signals  $\pm$  SEM (from human islets). **b** Equal amounts of RNA from various human tissues (each a pool of 3 tissue donors) was reverse-transcribed and miR-216a expression was determined by qRT-PCR. Threshold cycle 33 ( $C_t = 33$ ) was arbitrarily set as 1. **c** Human embryonic stem (ES) cells were differentiated to pancreatic endocrine cells for the indicated days and miR-216a expression was measured by qRT-PCR and expressed relative to levels in undifferentiated ES cells. **d** Fetal and adult human pancreata were probed with DIG-labeled miR-216a and scrambled control miRNA probes at the indicated gestational weeks. Purple color indicates presence of miRNA expression. Scale bar=1 mm (12w4d, Adult), Scale bar = 500  $\mu$ m (8w5d, 14w4d). Insets are enlarged 20x. **e** Comparison of mature miR-216a sequences in different species. **f** Same as in (b) except that the tissues were harvested from 8-week old C57BL/6 male mice.  $n = 3$ . Individual data points are shown in c and f and data represent mean  $\pm$  SEM.

# Figure 2

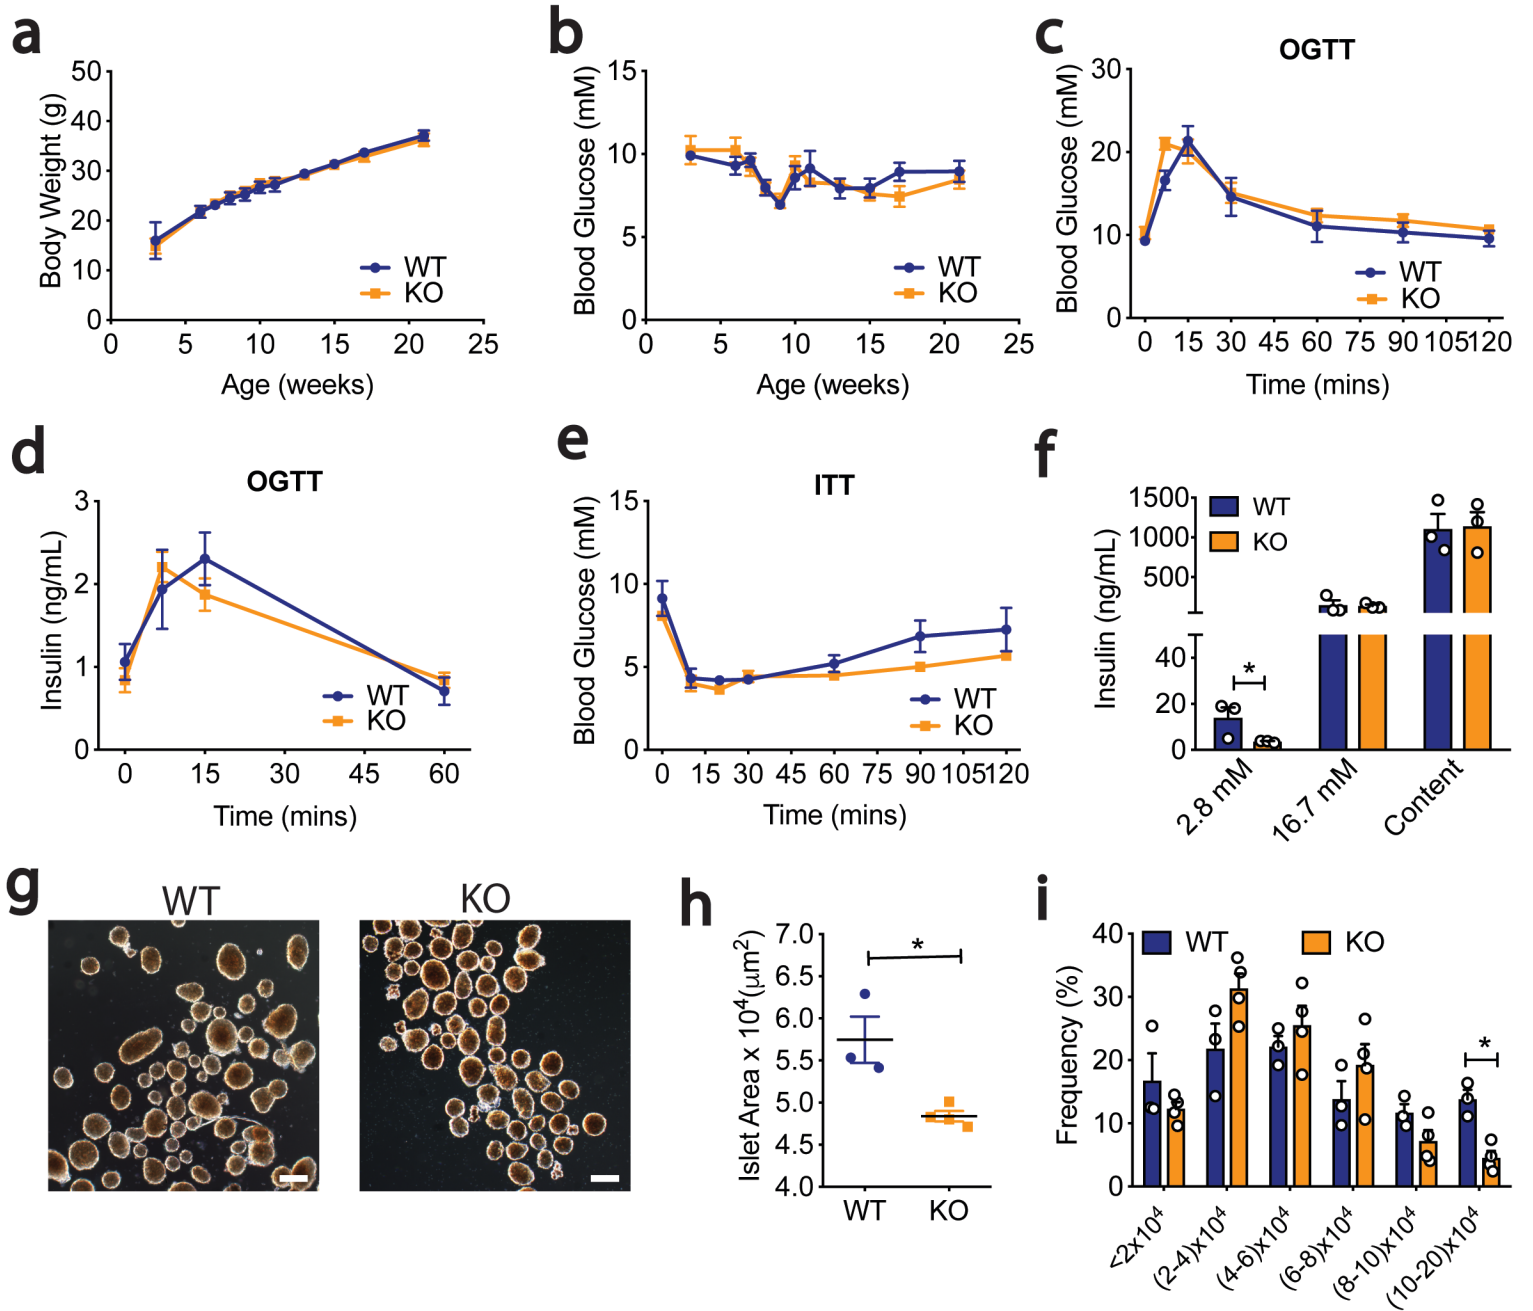

**Figure 2. miR-216a knock-out (KO) mice have smaller islets than wild-type (WT) mice.** WT and miR-216a KO male mice on regular chow diet were monitored for body weight (a) and blood glucose (b) for 21 weeks. n = 4-7. Oral glucose tolerance test (OGTT) performed in 10-week old male mice, with measurement of blood glucose levels (c) and plasma insulin concentration (d). e Insulin tolerance test (ITT) in 12-week old male mice injected with 1U/kg insulin at time = 0 and blood glucose levels determined at the indicated time points. f Insulin content and secretion from islets isolated from male WT and KO mice exposed to 2.8 mM and 16.7 mM glucose. n = 3. g Representative images of isolated islets from 10-week old male WT and KO mice. Scale bar=100  $\mu$ m. h Average size of isolated islets and the distribution of islet size (i). n = 3-4. A two-tailed Student's t-test was performed to assess significance. \*p<0.05 Individual data points are shown in f, h, and i. Data represent mean  $\pm$  SEM.

# Figure 3

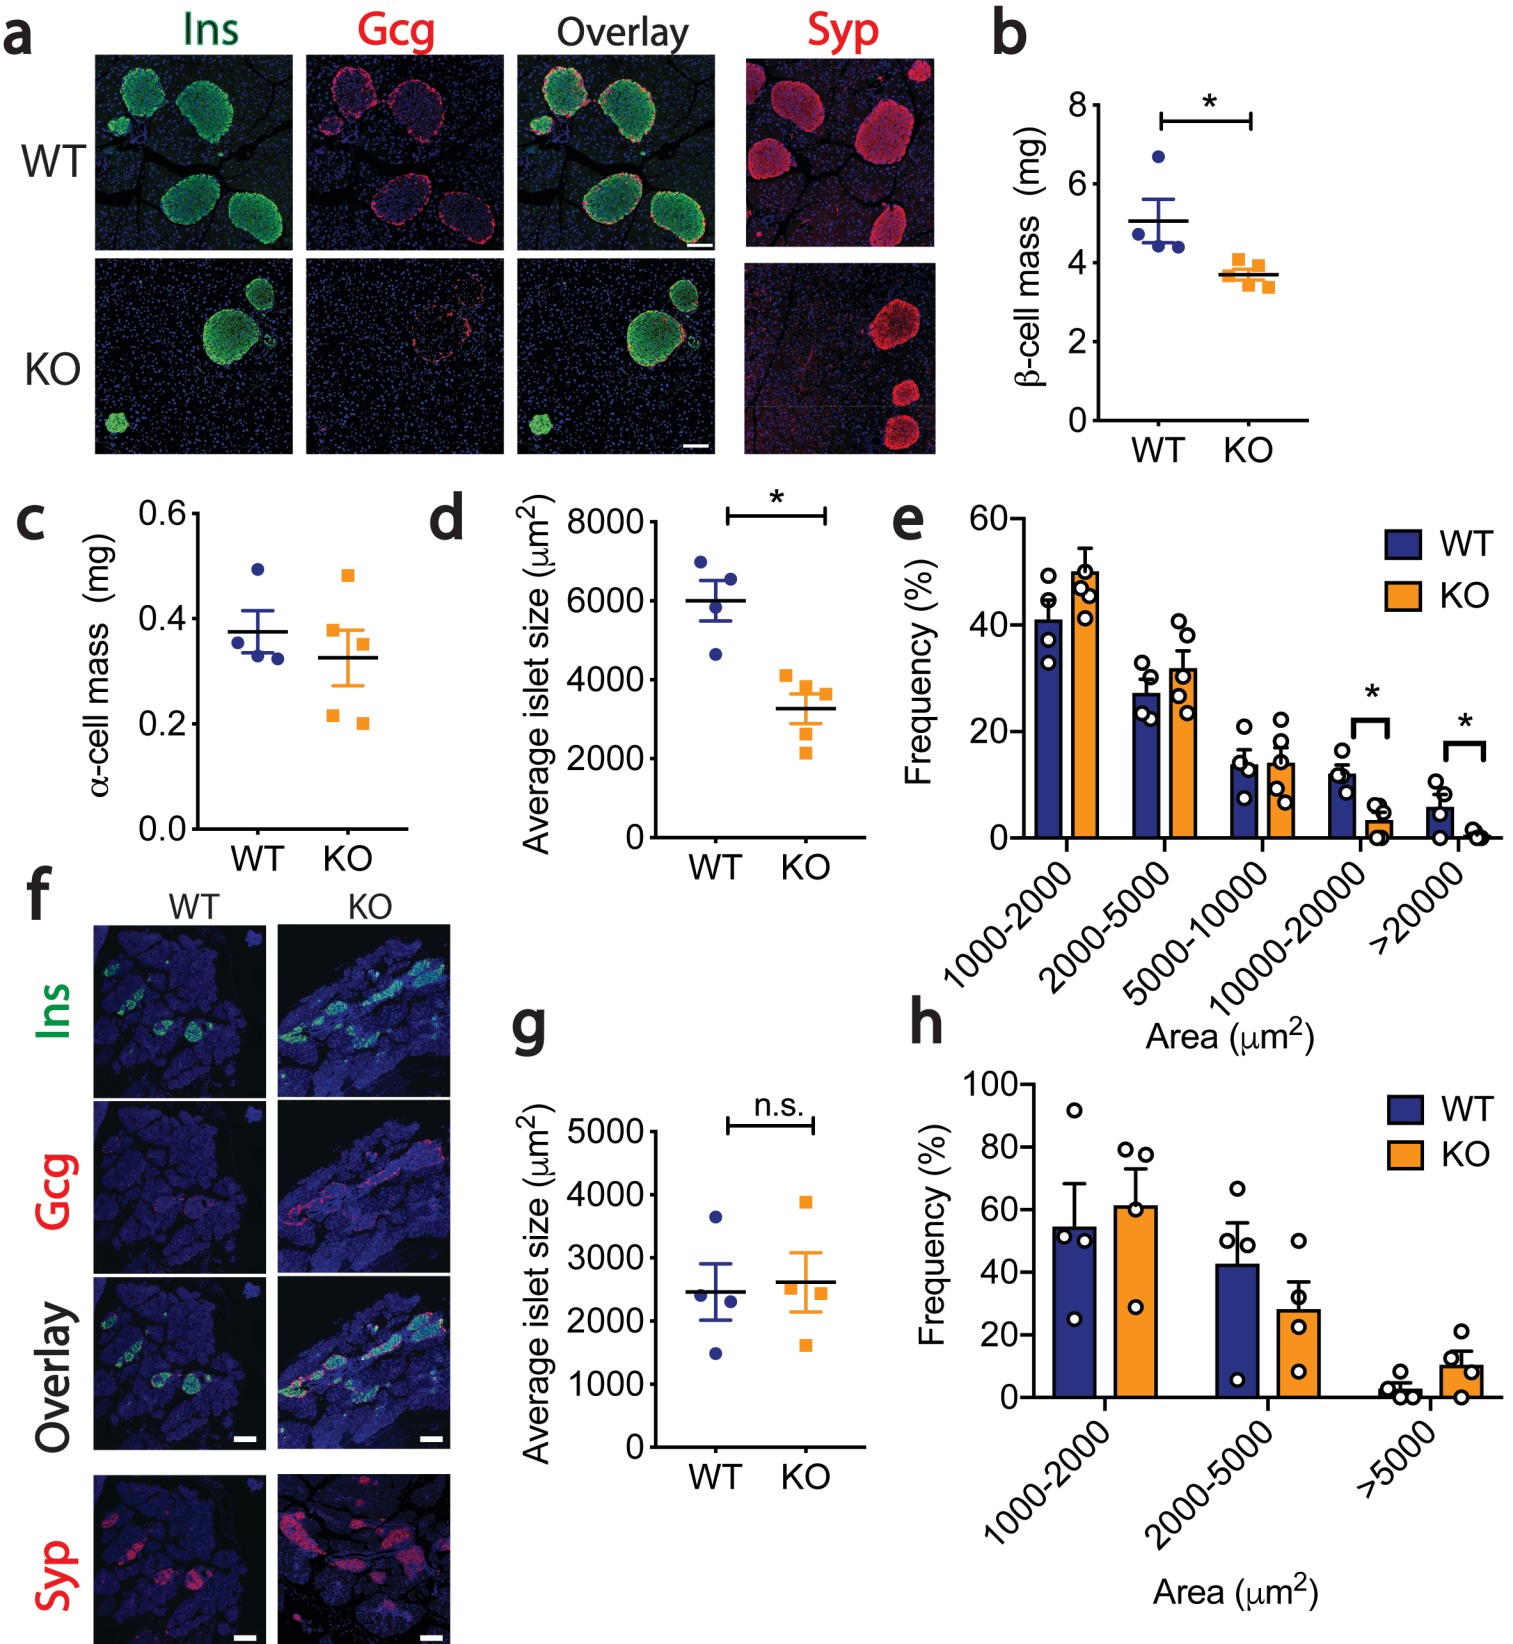

**Figure 3.  $\beta$ -cell mass is reduced in miR-216a KO mice.** **a-e** Pancreata from 21-week old male WT and KO mice were immunostained for insulin, glucagon and synaptophysin. **a** Representative images of insulin (Ins), glucagon (Gcg) and synaptophysin (Syp) immunostaining, along with an overlay of Ins and Gcg. Nuclei were identified with dapi (blue). Scale bars = 100  $\mu\text{m}$ . **b**  $\beta$ -cell mass, **c**  $\alpha$ -cell mass, **d** Average islet size, and **e** Islet size distribution.  $n = 4-5$ . **f-h** Pancreata from 1-day old male WT and KO mice were immunostained for insulin, glucagon and synaptophysin. **f** Representative images of insulin (Ins), glucagon (Gcg) and synaptophysin (Syp) immunostaining, along with an overlay of Ins and Gcg. Nuclei were identified with dapi (blue). Scale bar = 100  $\mu\text{m}$ . **g** Average islet size, and **h** Islet size distribution. A two-tailed Student's t-test was performed to assess significance. \* $p < 0.05$ . Individual data points are shown in (**b-e**, **g-h**). Data represent mean  $\pm$  SEM.



# Figure 4

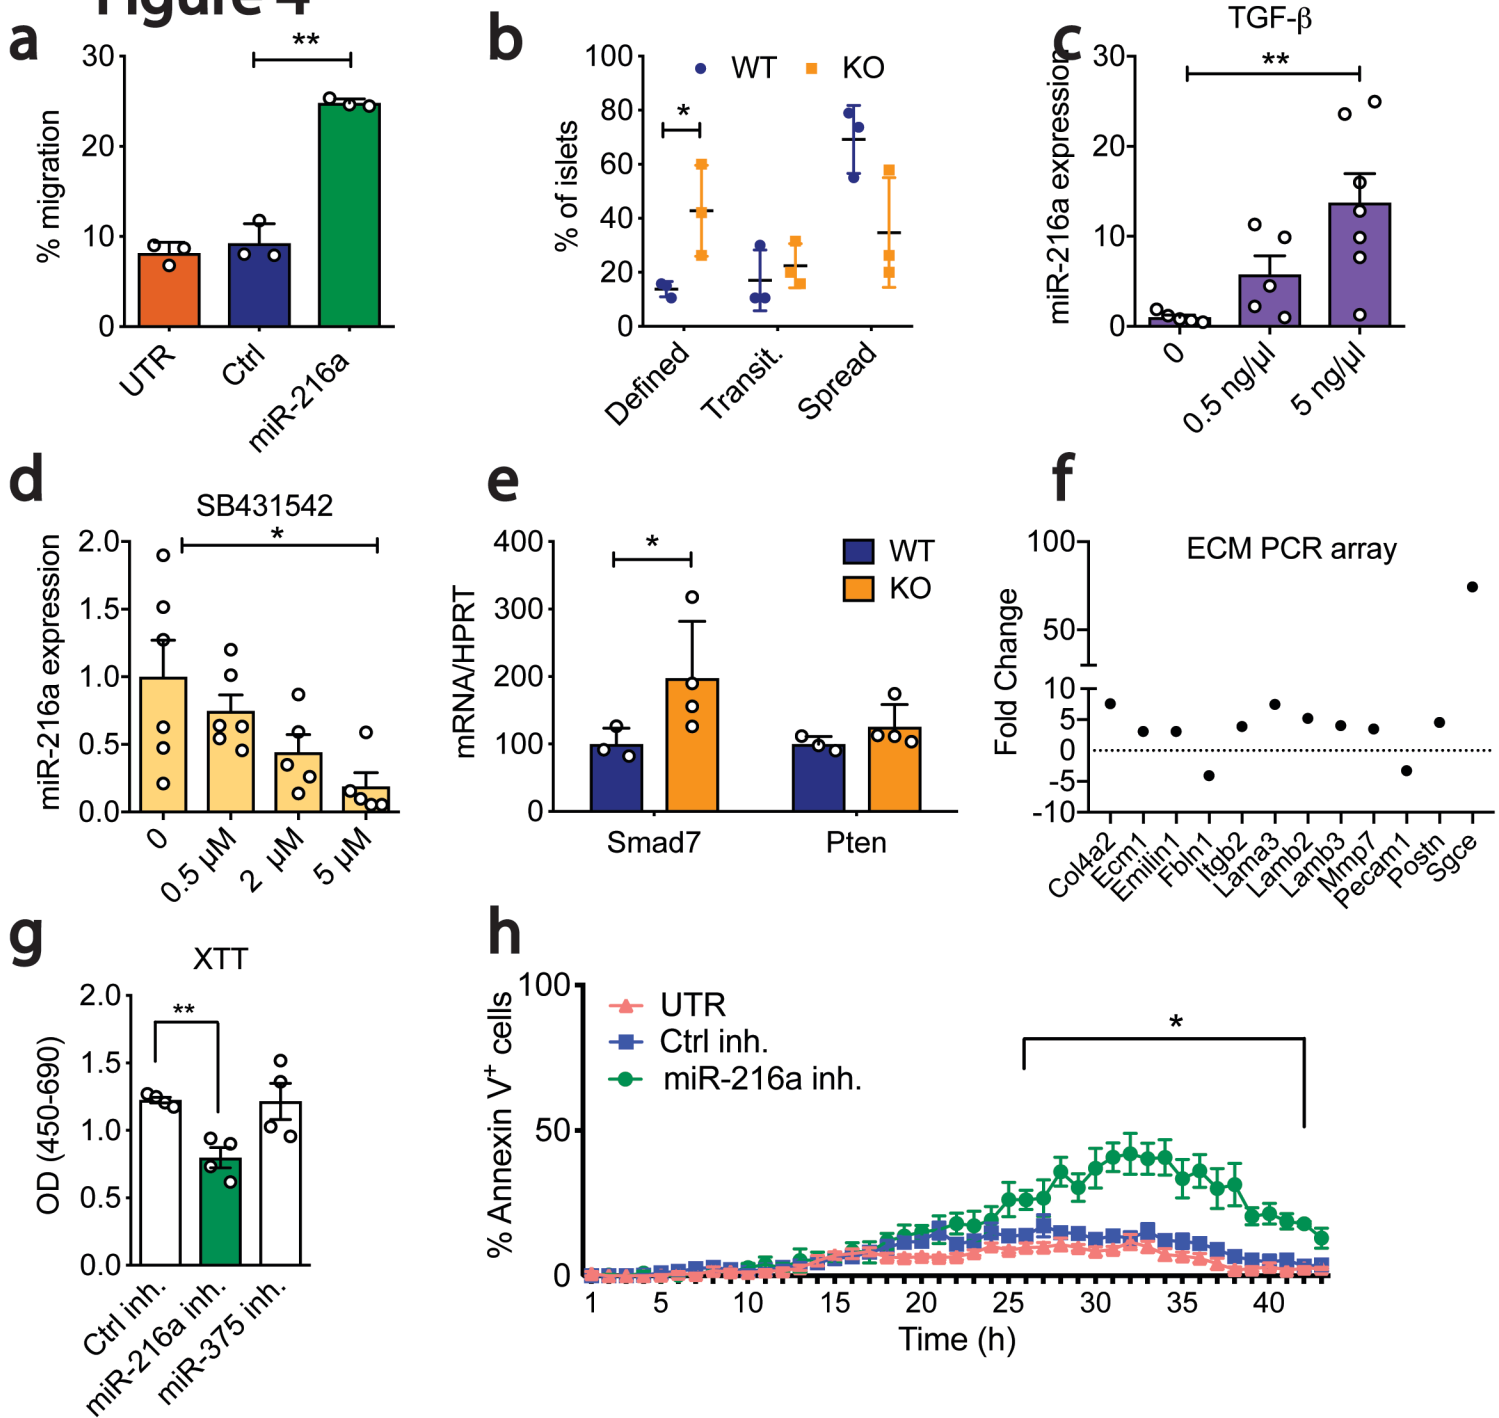

**Figure 4. miR-216a regulates cell migration and apoptosis.** **a** Percent of calcein stained PANC-1 cells migrating through a transwell following transfection with miR-216a or control (Ctrl) mimetics or untransfected (UTR).  $n = 3$ . **b** Percent of islets isolated from 10-week old male WT or KO mice that appeared as either having defined, transitional (transit.) or spread boundaries three days after plating on collagen wells.  $n=3$ . **c-d** Human EndoC- $\beta$ H1 cells were treated with varying concentrations of **c** TGF- $\beta$  or **d** TGF- $\beta$  inhibitor SB431542 and miR-216a levels were quantified by qRT-PCR.  $n=6$ . **e** Islets from 10-week old male WT and KO mice were isolated and expression of Smad7 and Pten was quantified with qRT-PCR.  $n = 3-4$ . **f** MIN6 cells were transfected with miR-216a and control mimetics and expression of 84 ECM related genes was quantified by qRT-PCR. Genes displaying > 2-fold difference are shown. Each value is the mean of 3 independent transfections. **g-h** INS1-E cells were transfected with the indicated miRNA inhibitors (inh.) or with a scrambled control miRNA inhibitor (Ctrl inh.) and cell viability was assessed by XTT (2,3-bis-(2-methoxy-4-nitro-5-sulfophenyl)-2H-tetrazolium-5-carboxanilide) assay (**g**) or live cell imaging using Hoechst and Alexa647 annexinV (**h**). TNF- $\alpha$ , IFN- $\gamma$  and IL-1 $\beta$  were added to media prior to imaging cells at 37°C and 5% CO<sub>2</sub> in an ImageXpress Micro.  $n = 4$ . A two-tailed Student's t-test (**a-e, g**) or two-way ANOVA with Bonferroni's multiple comparison post-test (**h**) were performed to assess significance. \* $p < 0.05$ , \*\* $p < 0.01$ . Individual data points are shown in (**b-e, g-h**). Data represent mean  $\pm$  SEM.

## Figure 5

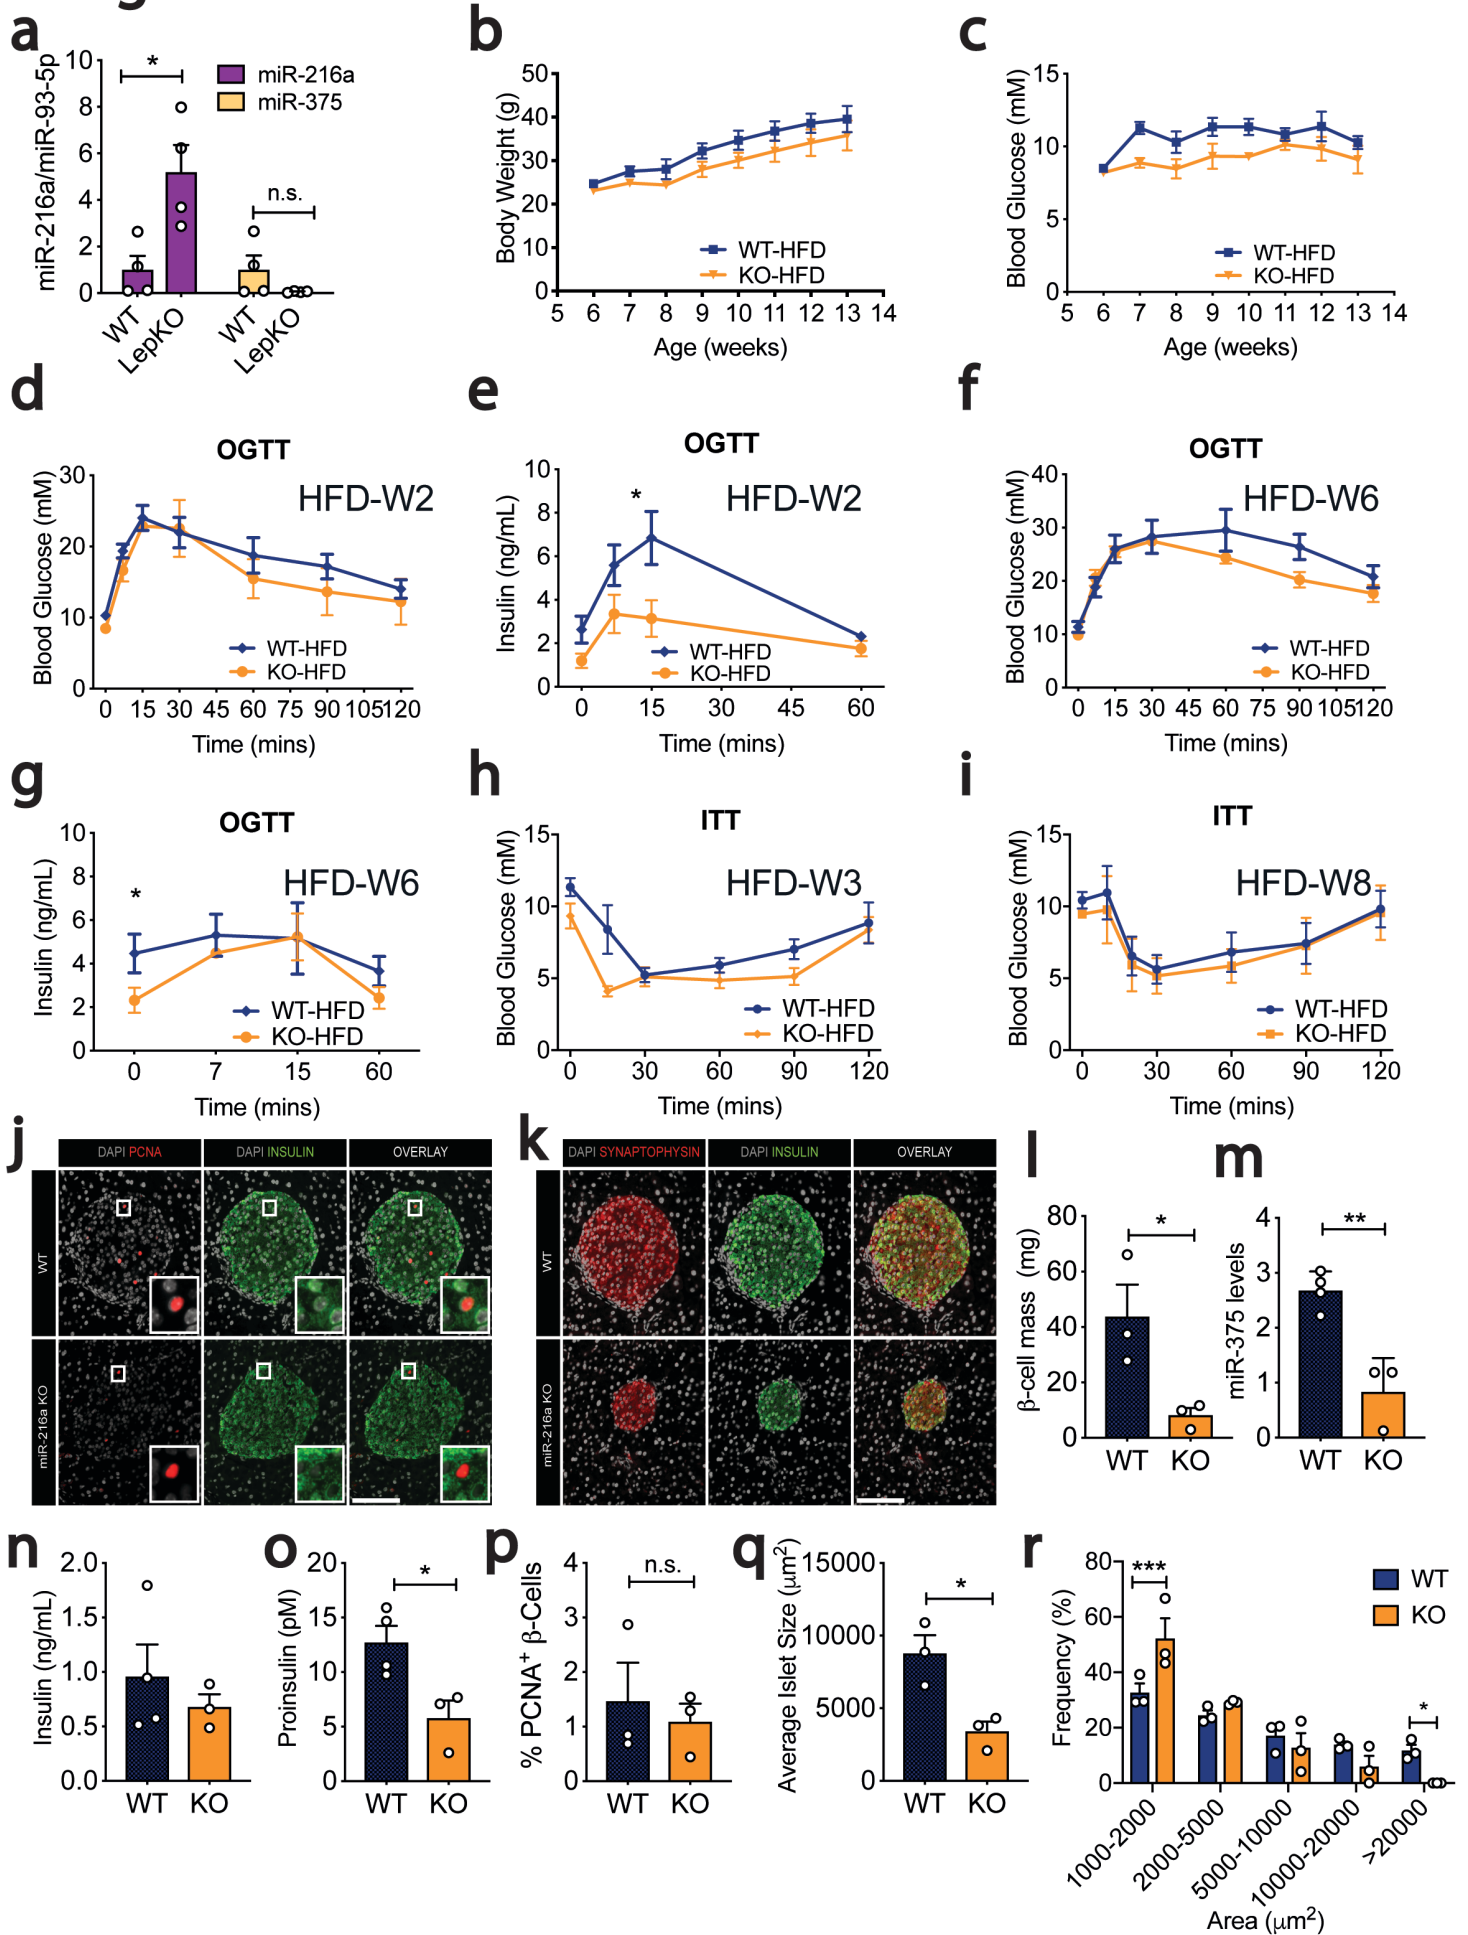



**Figure 5. miR-216a KO mice have decreased  $\beta$ -cell mass and islet size on high-fat diet (HFD).** **a** Islets were isolated from WT and Leptin knock-out male (LepKO) rats and expression of miRNAs was quantified by qRT-PCR and expressed relative to levels in WT cells. **b-r** WT and miR-216a KO male mice were fed with a 60% HFD for 8-weeks and weekly body weight (**b**) and fasted blood glucose levels (**c**) were measured. **d-g** Oral glucose tolerance tests (OGTT) were performed 2 weeks and 6 weeks post HFD, with measurement of blood glucose levels (**d, f**) and plasma insulin concentrations (**e, g**). **h, i** Blood glucose levels during insulin tolerance tests (ITT) performed 3 weeks (**h**) and 8 weeks (**i**) post HFD. **j-k** Pancreata from WT and miR-216a KO mice were fixed and stained with the indicated antibodies 8 weeks post HFD. Representative images are shown. Scale bars = 100  $\mu$ m. Insets are enlarged 4x. **l, p, q** Quantifications of insulin (**l**), PCNA (**p**) and synaptophysin (**q-r**) immunoreactivity. n = 3. **m** qRT-PCR analysis for miR-375 from plasma of WT and miR-216a KO mice, 8-weeks post HFD, n = 4. **n** Plasma insulin **o** Plasma proinsulin levels from WT and miR-216a KO mice, 8-weeks post HFD, n = 3-4. **q** Average islet size and **r** islet size distribution based on synaptophysin immunostaining. A two-tailed Student's t-test (**a, l-r**) or two-way ANOVA with Sidak's multiple comparison post-test (**e, g**) were performed to assess significance. \*p<0.05, \*\*p<0.01, \*\*\*p<0.001. Individual data points are shown in (**a, l-r**). Data represent mean  $\pm$  SEM.

# Figure 6

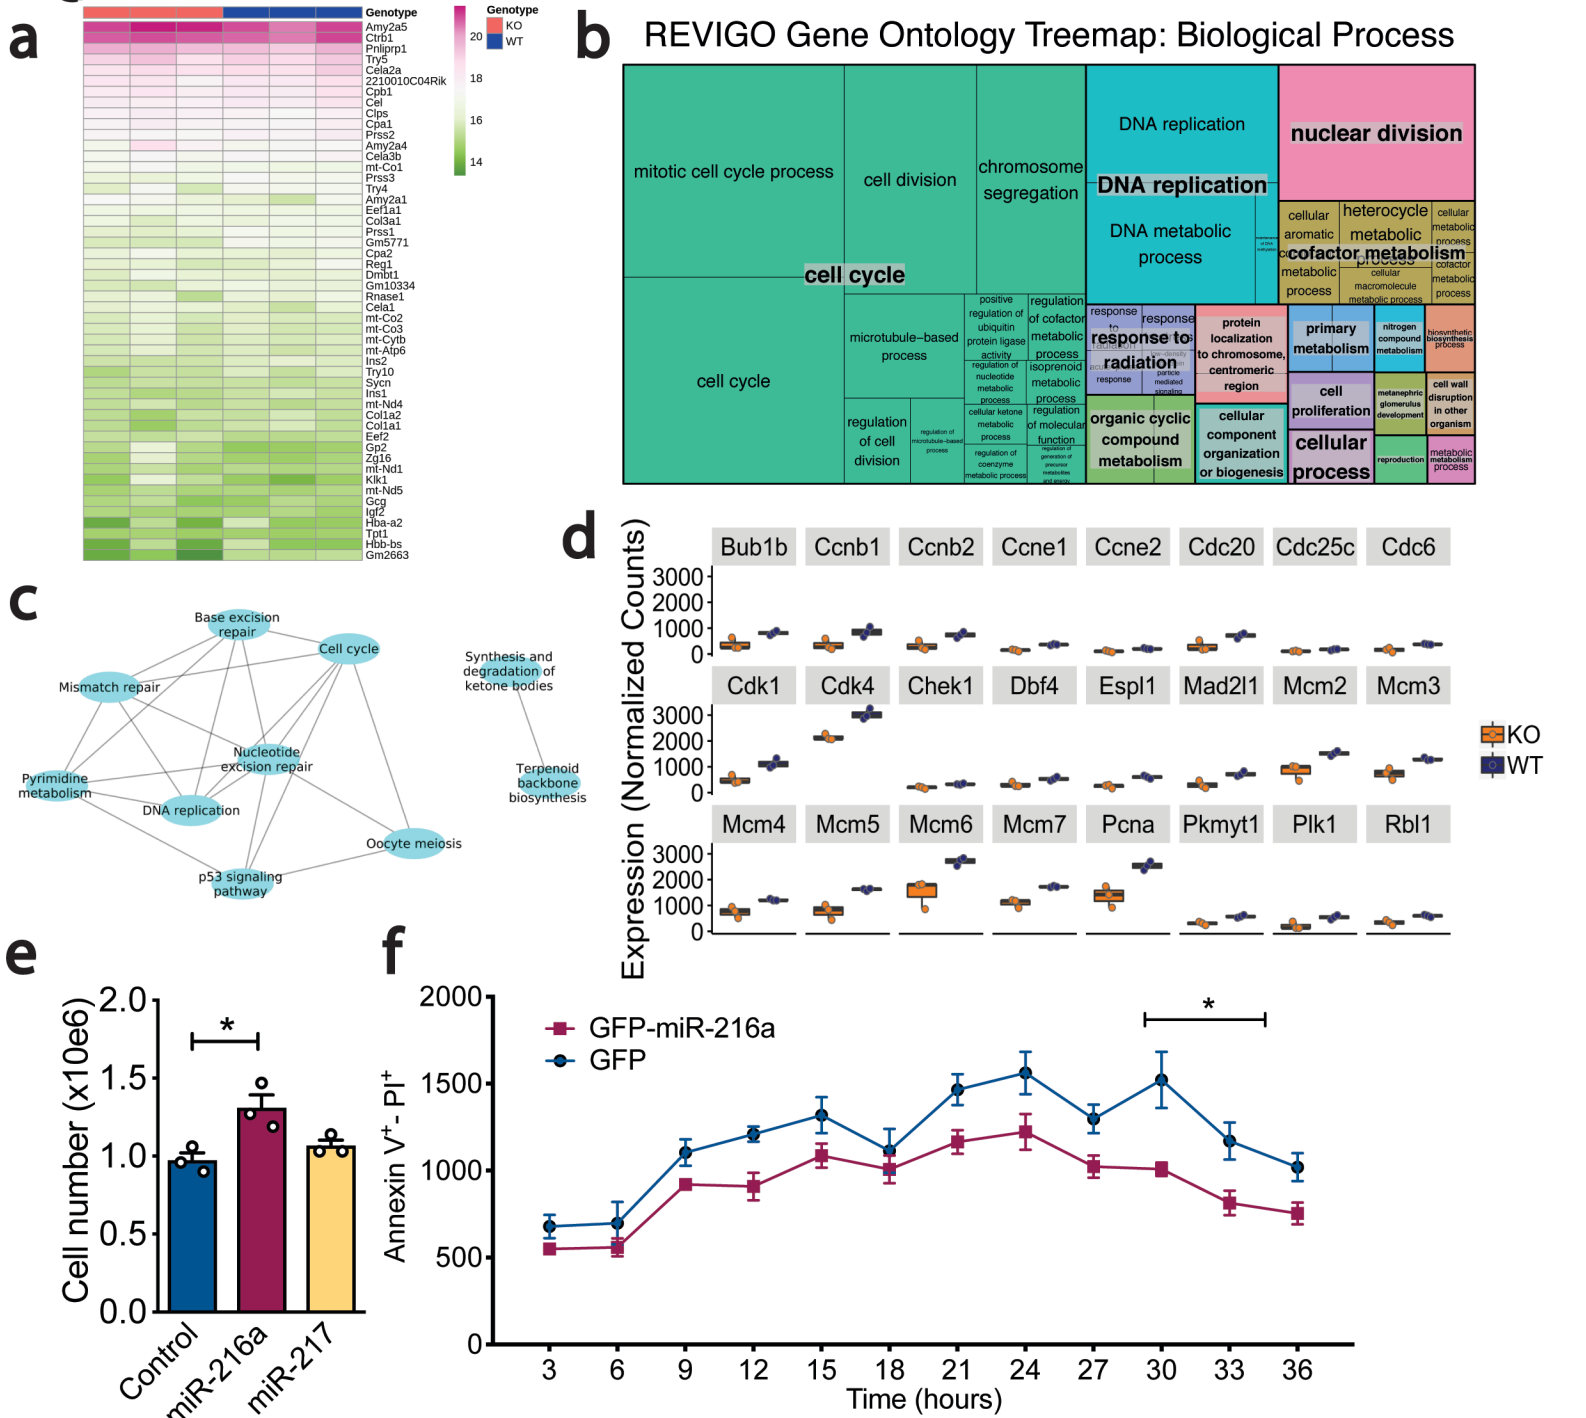

**Figure 6. RNA-seq analysis of pancreata from miR-216a-KO mice.** **a** RNA from the pancreata of 1-day old male WT and miR-216a KO mice was isolated and subjected to RNA sequencing and top 50 most abundant genes are shown by heat map. **b** A treemap plot, combining statistically significant GO terms in the biological processes category into similar terms. The size of the square increases with a decreasing p-value, and the colour of the square indicates the grouping of like terms (labelled in larger text with a grey background). Statistically significant terms were identified using hypergeometric tests with a false discovery rate of 0.1. **c** All statistically significant KEGG terms are shown in a network map, with nodes representing KEGG terms and edges connecting nodes representing differentially expressed genes in common between KEGG terms. Statistically significant terms were identified using hypergeometric tests with a false discovery rate of 0.1. **d** Normalized gene expression data for key genes of interest. All genes shown are differentially expressed, with adjusted p-values < 0.05 (adjusted by the Benjamini Hochberg correction). **e-f** PANC-1 cells were transfected with the indicated miRNAs and 48-hours later TGF- $\beta$  was added to cell culture media and cell number was counted (**e**). Individual data points are shown.  $n = 3$ . **f** Cell death was assessed with live cell imaging using Hoechst and Alexa647 annexinV. Cells were imaged at 37°C and 5% CO<sub>2</sub> in an ImageXpress Micro.  $n = 5$ . A two-tailed Student's t-test (**e**) or two-way ANOVA with Bonferroni's multiple comparison post-test (**f**) were performed to assess significance. \* $p < 0.05$ . Data represent mean  $\pm$  SEM,  $n = 3$ .

# Figure 7

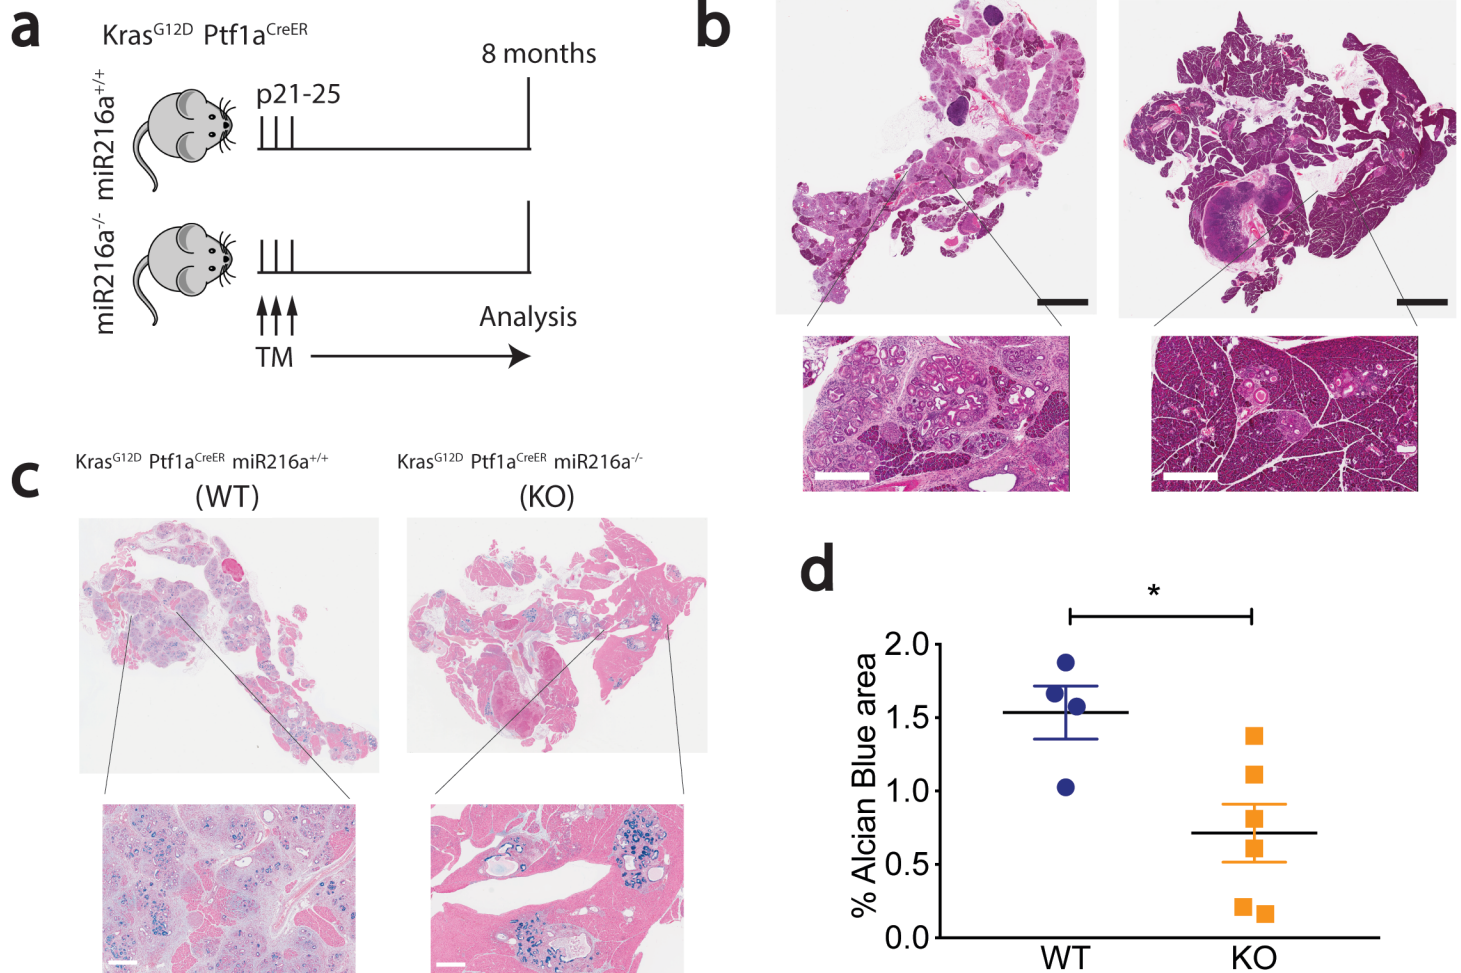

**Figure 7. miR-216a-KO mice have lower incidence of pancreatic intraepithelial (PanIN) lesions.** **a** Schematic showing the design of the study. Expression of  $Kras^{G12D}$  was induced in exocrine cells by 3 tamoxifen injections on alternating days when the mice were 21-25 days old. Pancreata were harvested 8 months later. **b** Pancreatic H&E staining. Scale bars (black) = 3 mm, inset scale bars (white) = 400  $\mu$ m. **c** Pancreatic alcian blue staining. Insets are 5x enlarged, inset scale bars = 400  $\mu$ m. **d** Alcian blue positive area. Individual data points are shown. n = 4-6. A two-tailed Student's t-test was performed to assess significance. Data represent mean  $\pm$  SEM. \* $p < 0.05$ .

# Supplementary 1

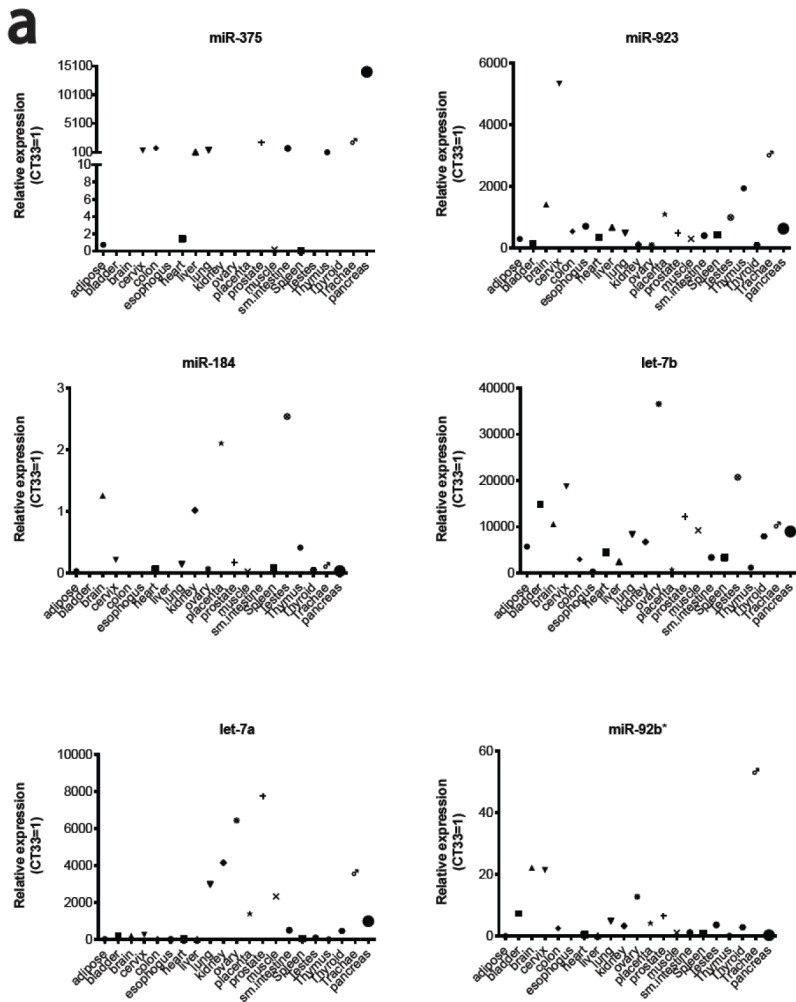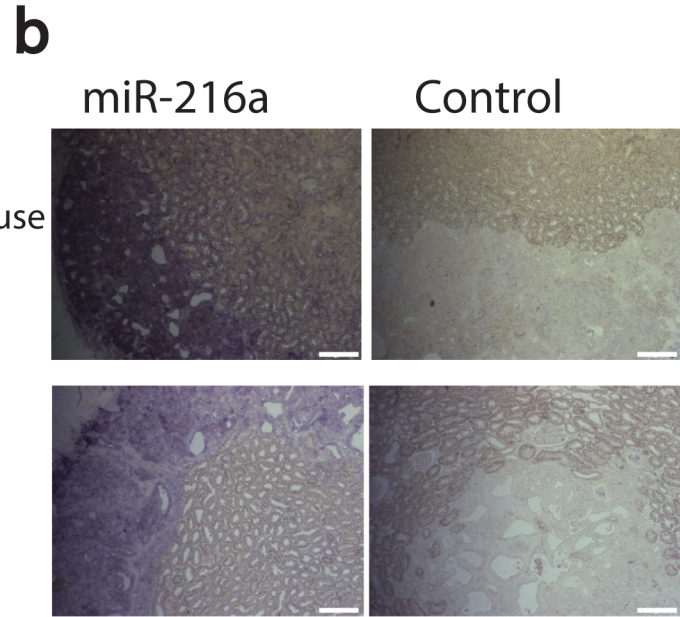

**Suppl. Figure 1. a** Expression of the indicated miRNAs in various human tissues. Equal amounts of RNA from human tissues (each a pool of 3 tissue donors) was reverse-transcribed and expression of indicated miRNAs was determined by qRT-PCR. Threshold cycle 33 (Ct = 33) was arbitrarily set as 1. **b** miR-216a is expressed in pancreatic tissue differentiated from hESCs. Representative in situ hybridization images of differentiated hESC-derived grafts at 22 weeks post implant in a mouse and a rat. Grafts harvested from mice and rats were probed with DIG-labeled miR-216a and scrambled miRNA control probes. Scale bars = 100  $\mu$ m.



# Supplementary 2

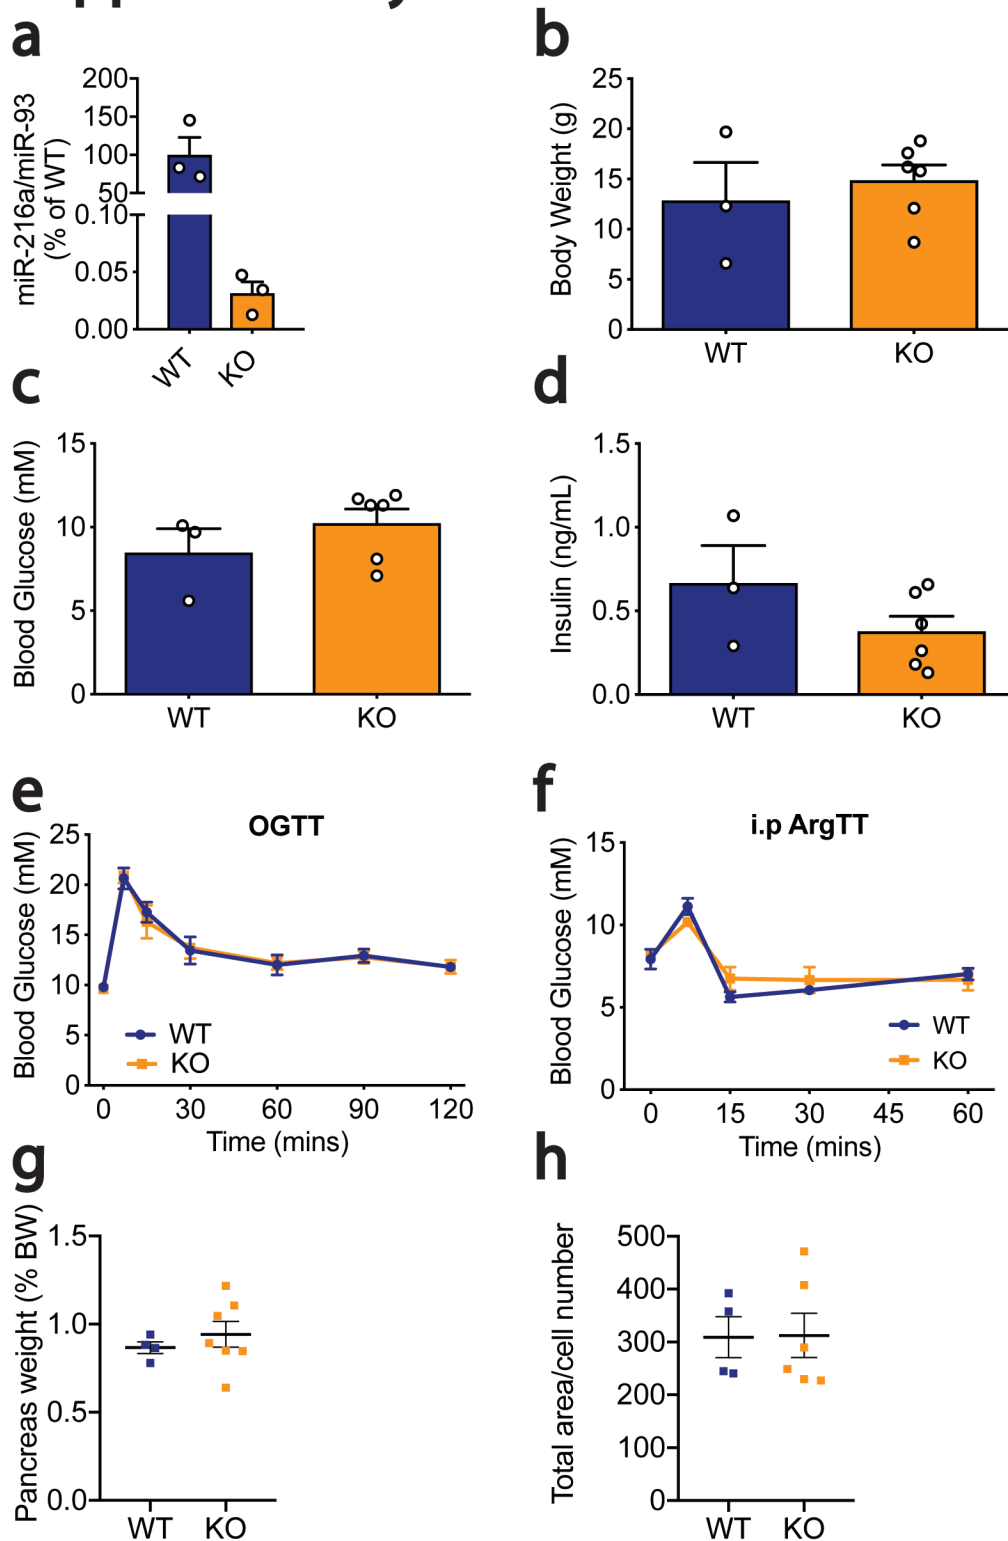

**Suppl. Figure 2. miR-216a KO mice do not display alterations in glucose homeostasis.** **a** Islets from 10-week old male WT and miR-216a KO mice were isolated and miRNA expression was quantified with qRT-PCR.  $n = 3$ . **b-d** Body weight (**b**), fasting blood glucose (**c**), and insulin measurements (**d**) from 3-4 week old male mice.  $n = 3-6$ . n.s. = non-significant. A two-tailed Student's t-test was performed to assess significance. **e** Oral glucose tolerance (OGTT) test performed on 15-week old mice. **f** Intraperitoneal arginine tolerance test (i.p. ArgTT) performed on 18-week old mice.  $n = 4-6$ . **g** Pancreata from 21-week old WT and miR-216a KO mice were weighed and normalized to body weight. **h** Pancreatic cell size was assessed by analyzing dapi staining from the pancreata of 21-week old male mice. Individual data points are shown in (**a-d, g-h**). Data represent mean  $\pm$  SEM.

# Supplementary 3

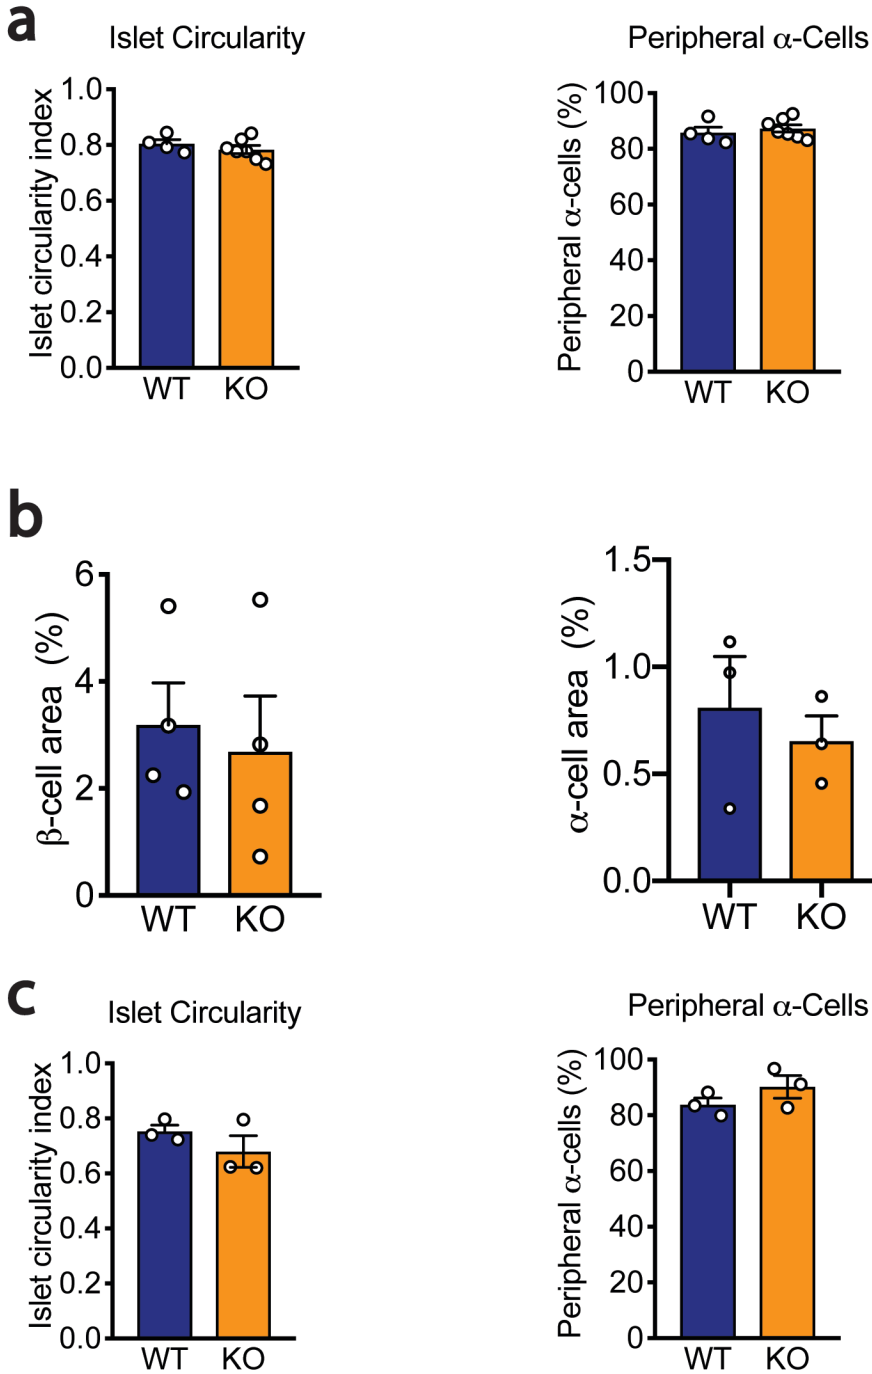

**Suppl. Figure 3. Islet circularity and peripheral  $\alpha$ -cell numbers are unchanged in miR-216a KO mice.** Pancreata from adult male mice (a; n=4-7) and 1-day old male neonatal mice (b-c; n = 3-4) were immunostained for synaptophysin, insulin and glucagon, and islet circularity, peripheral  $\alpha$ -cell percentage,  $\beta$ -cell area, and  $\alpha$ -cell area were calculated. Individual data points are shown. Data represent mean  $\pm$  SEM.

## Supplementary 4

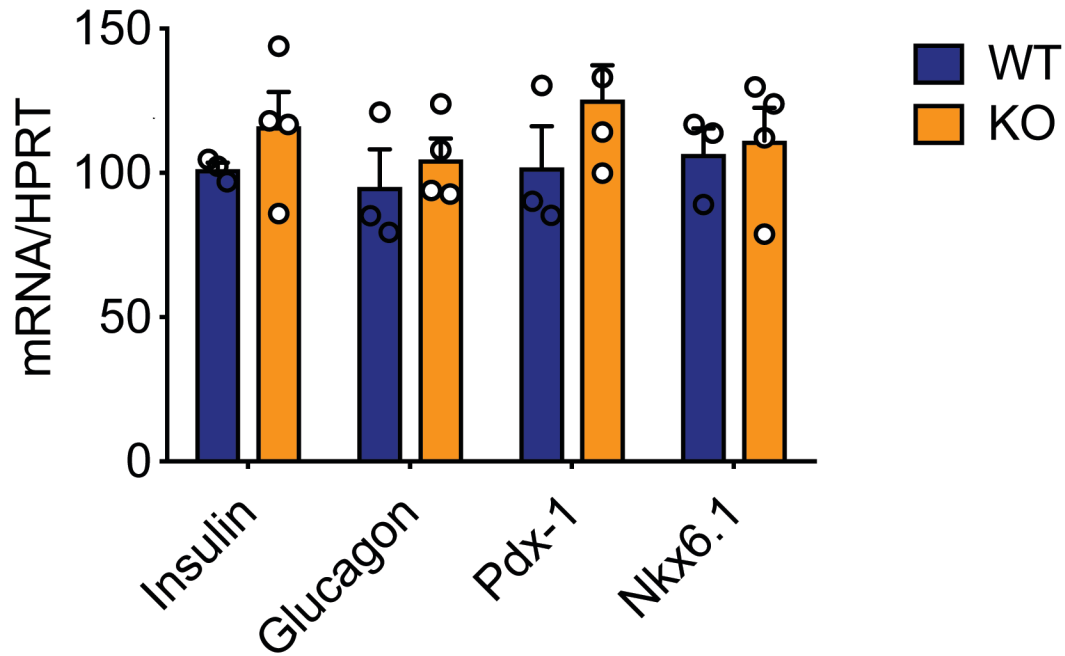

Suppl. Figure 4. Gene expression analysis using islets isolated from 10-week old male WT and miR-216a KO mice. RNA was isolated, reverse-transcribed and expression of the indicated genes was determined by qRT-PCR. WT levels arbitrarily set as 100. n = 3-4. Individual data points are shown. Data represent mean  $\pm$  SEM.

# Supplementary 5

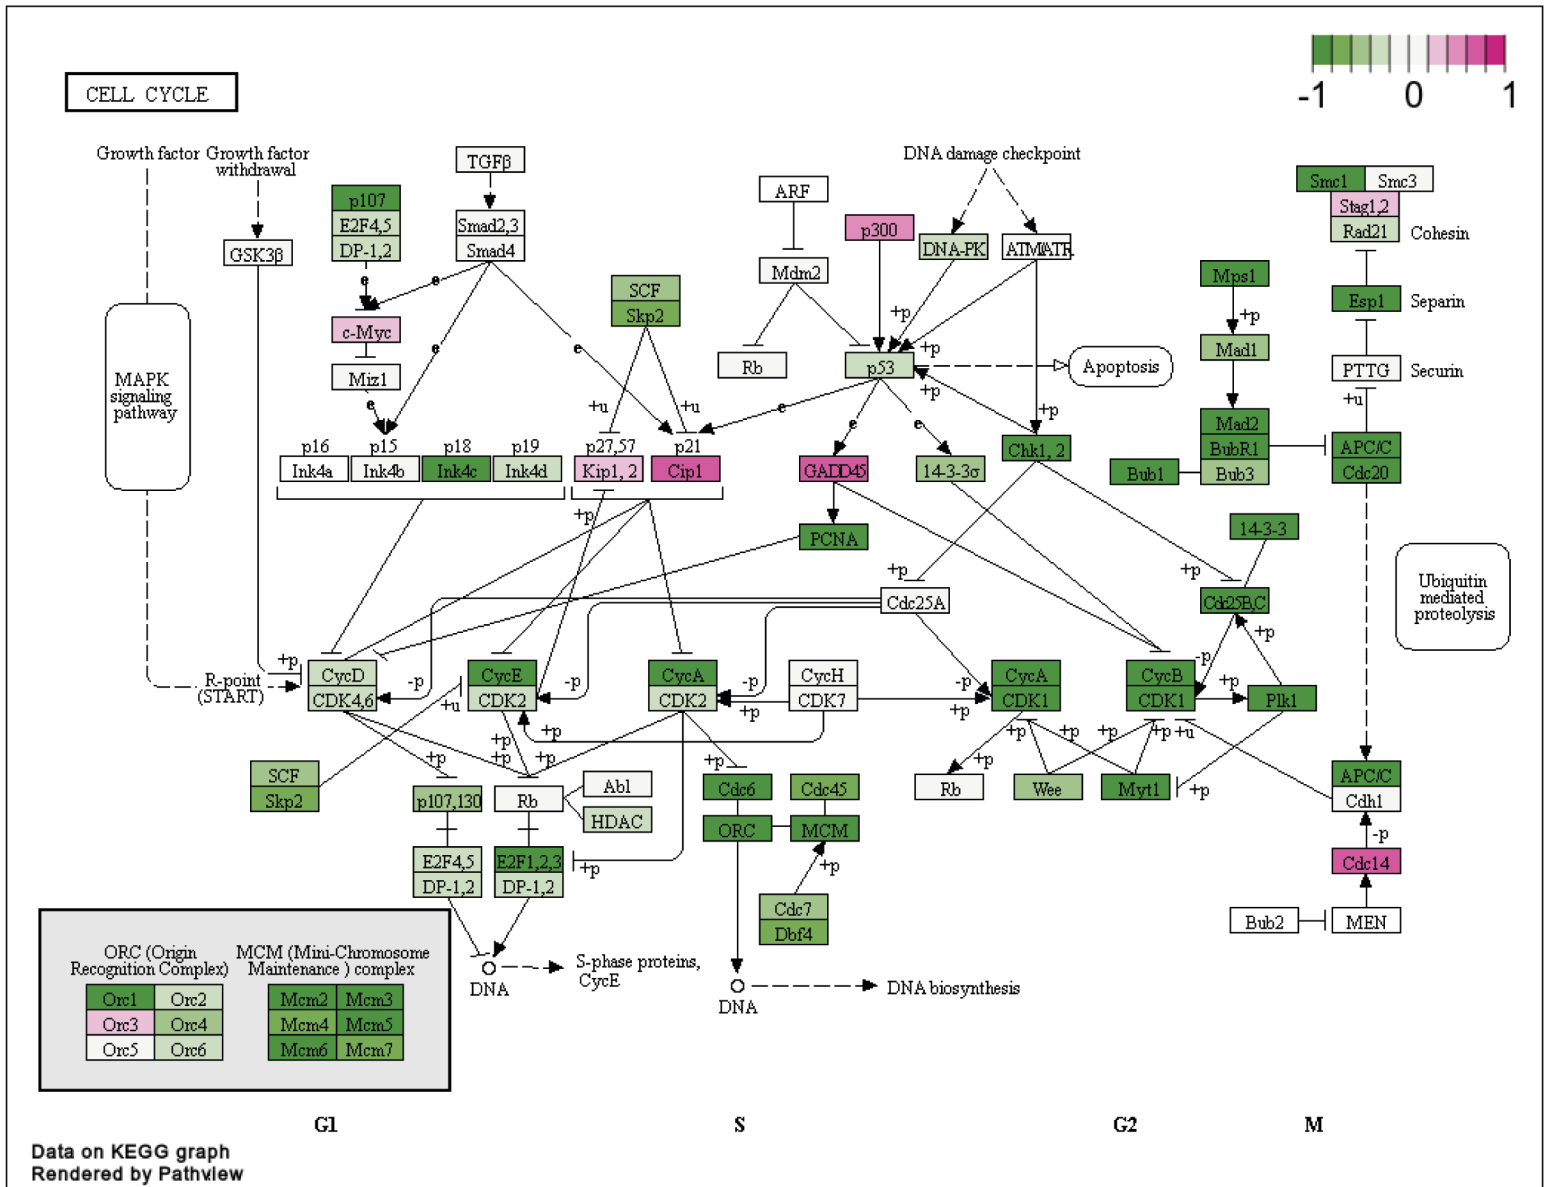

**Suppl. Figure 5. A cell cycle pathway map**, with genes significantly upregulated in miR-216a KO mice compared to WT mice shown in purple, and genes significantly downregulated in the KO mice compared to WT mice shown in green. Cell cycle is a significantly enriched GO “Biological Process” and KEGG term, with statistical significance defined as a q value < 0.1 (therefore allowing a 10% FDR).
